# Supplementary material
Source: PubMed Central journal article supplement (PMC3070491)
Supplement: NIHMS123668-supplement-1.pdf [file NIHMS123668-supplement-1.pdf]

## Supplementary figure 1 Optimization of DNA Binding

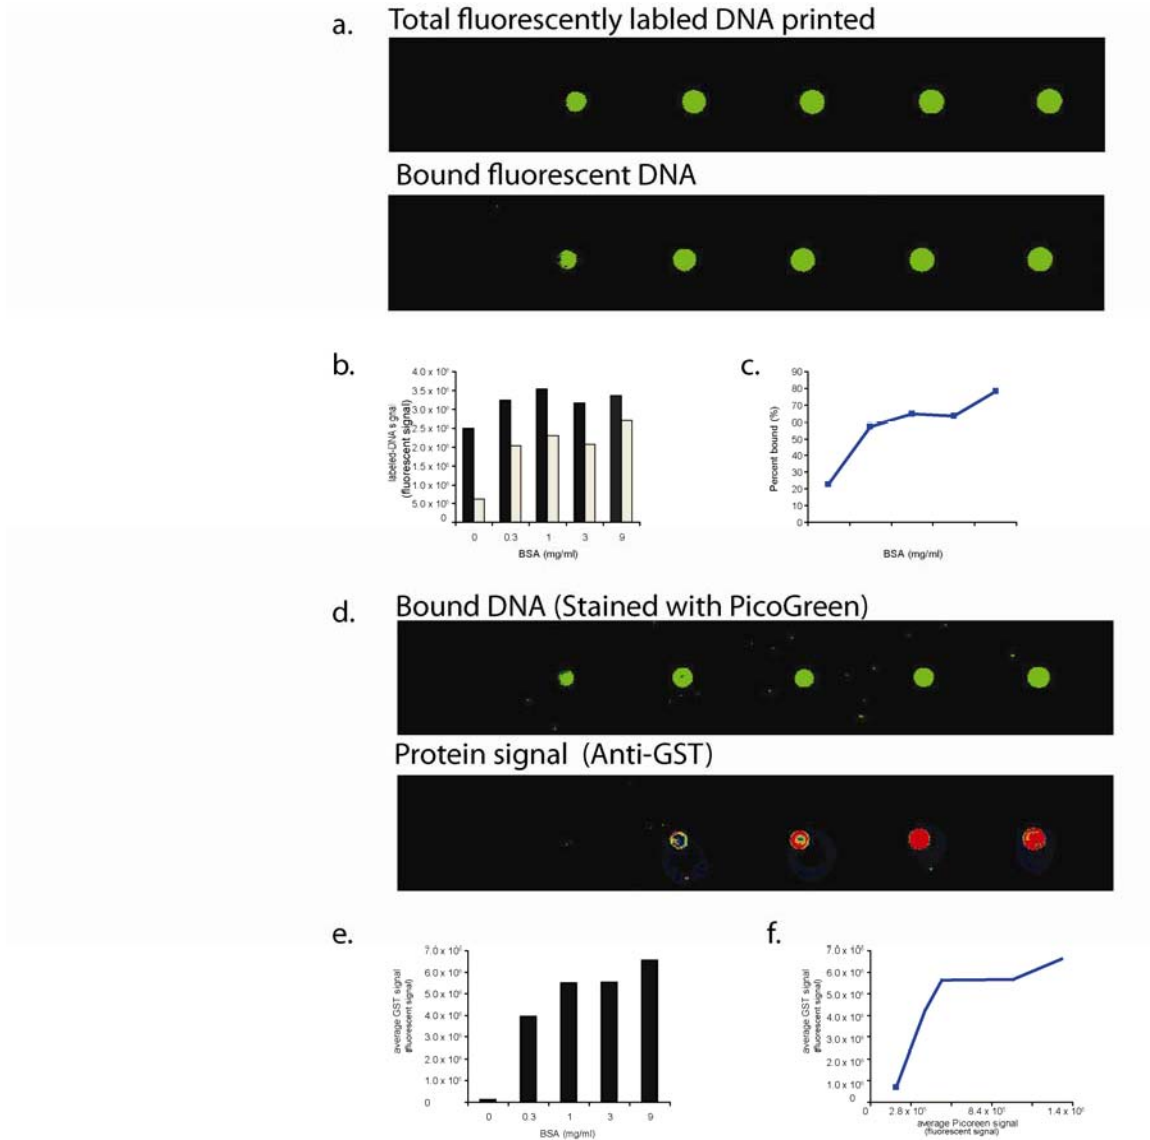

Supplementary figure 1. Optimization of DNA Binding. (a) To estimate the amount of DNA captured onto the array surface, 30  $\mu\text{g}$  of plasmid DNA was incubated with 20  $\mu\text{L}$  of PicoGreen dye. The DNA was precipitated and washed with 80% ethanol to remove unincorporated PicoGreen dye. DNA was dissolved to a final concentration of 1.5  $\mu\text{g}/\mu\text{L}$  and supplemented with the capture antibody (final 50  $\mu\text{g}/\text{mL}$ ), protein crosslinker (final 2 mM) and varying concentrations of BSA (0-9 mg/mL). The sample was printed onto amine coated glass slides,

and the printed samples were imaged. The slides were washed with 1xPBS for 1 hr at RT and the slides were imaged again to measure the bound fraction. **(b)** Total fluorescent DNA is indicated by black bar and bound DNA is indicated by the grey bar. **(c)** Amount of protein signal obtained with respect to the amount of DNA printed. **(d)** Sample containing unlabelled DNA (final 1.5  $\mu\text{g}/\mu\text{L}$ ), capture antibody (final 50  $\mu\text{g}/\text{mL}$ ), protein crosslinker (final 2 mM) and varying concentrations of BSA (09 mg/mL) were printed on to the amino coated array surface. The arrays were stained with PicoGreen dye to measure the DNA bound. To detect protein signal, the arrays were activated with the cell free lysate and stained with anti-GST antibody. The colors ranging from black, blue, green, yellow, to red represent low to high signal, respectively. **(e)** Amount of protein signal attained with increasing amounts of BSA. **(f)** Amount of protein signal obtained with respect to the amount of DNA bound.

## Supplementary figure 2 Purified protein spotting

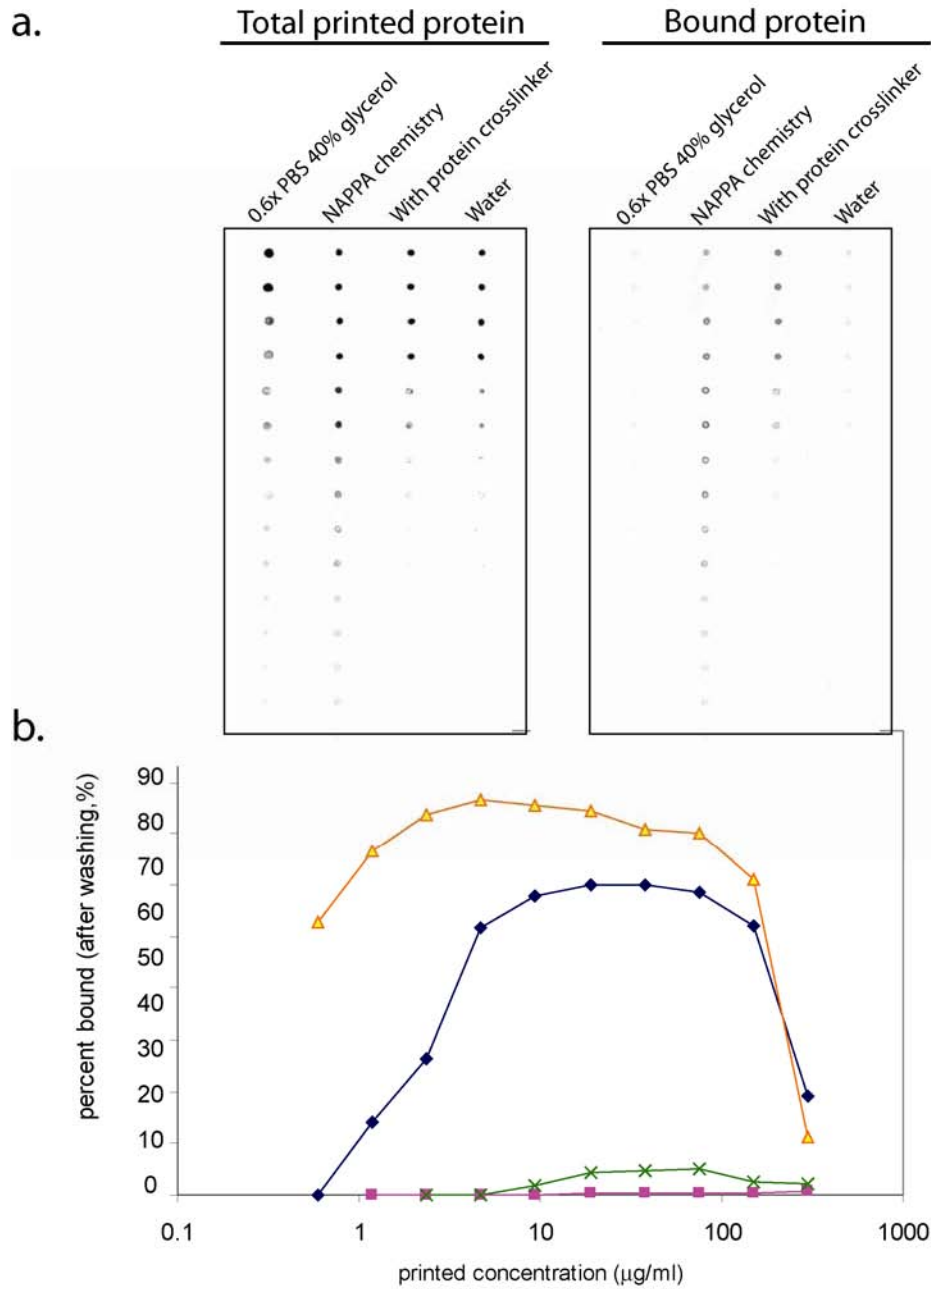

Supplementary Figure 2. Purified protein spotting. (a) Purified Cy5 labeled anti-mouse antibody was printed at various concentrations (0-300  $\mu\text{g/mL}$ ) in four different buffers: 0.6x PBS with 40% glycerol; NAPPA chemistry (BSA (3 mg/mL), crosslinker (2 mM)); crosslinker only (2

mM); and water. The arrays were imaged to determine total signal from the printed protein and then washed in 1x PBS for 1 hour and re-imaged to determine signal from the bound protein. **(b)** The binding efficiency of the protein under various spotting conditions was determined by dividing the bound signal by the total signal.

### Supplementary figure 3 Signal variation

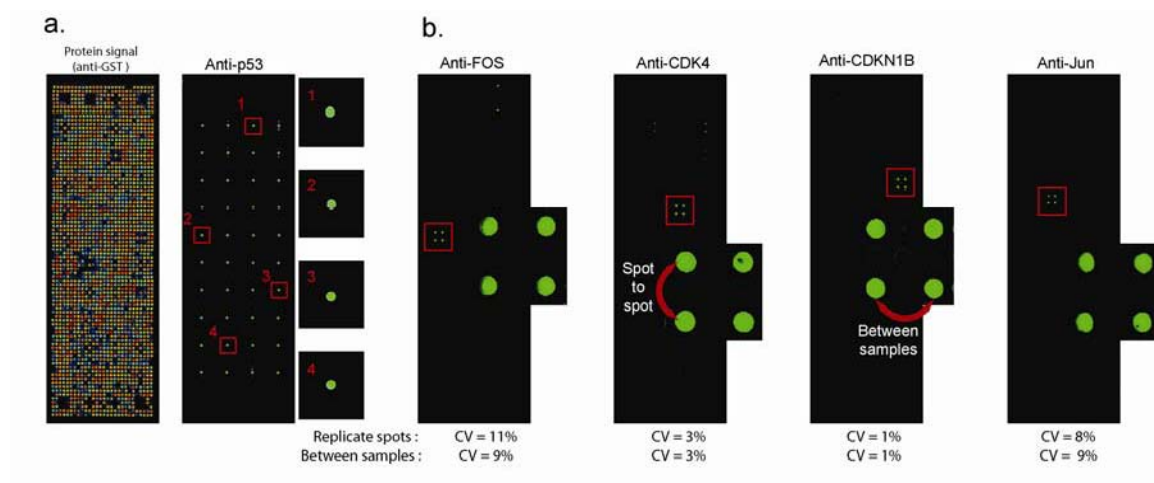

Supplementary Figure 3. Signal variation. **(a)** To assess the zone variation due to array processing, a single sample preparation of the *p53* gene was aliquoted into multiple wells and printed throughout the high density array (left panel) in a 4 x 10 pattern. The *p53* protein signal from all 40 *p53* features was detected using an anti-*p53* antibody (CV for 40 spots = 7%). Crosstalk of the *p53* signal into the neighboring spots was evaluated by comparing the signal intensity of the spots surrounding the *p53* against a group of spots that were at least 4 spots or 2572 microns away from the nearest *p53* signal. The average signal neighboring *p53* was 1.9% of the *p53* signal (compared with 0.7% for control features). **(b)** To assess the variation in sample preparation prior to printing, we independently processed duplicate samples for 48 genes. The samples were printed and their protein signal was measured using protein specific antibodies when available. Between sample CV was calculated based on the 4 spots (duplicates of the two independently processed samples).

## Supplementary Methods

Expression plasmids were transformed into *E.coli* DH5alpha and grown overnight at 37°C in 1.5 mL terrific broth and ampicillin (100 µg/mL). Cultures were pelleted by centrifugation at 5000 rcf for 15 mins. DNA was purified using the NucleoPrepII anion exchange resin (Macherey Nagel). Bacterial pellets were resuspended by vortex in 200 µL Buffer 1 (50 mM tris, 10 mM EDTA, 100 µg/mL RNase A). Cells were lysed by adding 200 µL Buffer 2 (200 mM NaOH, 1% SDS), mixing by block inversion and incubating for 5mins. The preparation was neutralized by adding 200 µL Buffer 3 (2.8 M KOAc, pH to 5.3 with glacial acetic acid) and mixing by block inversion. The resulting lysate from the alkaline lysis preparation was cleared by centrifugation at 5000 rcf for 15 mins. The supernatant was loaded directly onto 80 mg of equilibrated (Buffer N2: 100 mM tris, 900 mM KCl, 15% EtOH, 0.15% Triton X-100, pH to 6.3 with phosphoric acid) NucleoPrep II anion exchange resin using a Biomek FX (Beckman Coulter) automated laboratory workstation. The column was washed with 2 mL of wash Buffer N3 (100 mM tris, 1.15 M KCl, 15% EtOH, pH to 6.3 with phosphoric acid) over vacuum, dried by centrifugation and eluted with 300 µL Elution Buffer N5 (100 mM tris, 1 M KCl, 15% EtOH, pH to 8.5 with phosphoric acid). Automated addition of all solutions was accomplished using a WellMate (Matrix) rapid bulk liquid-dispensing instrument.

Purified DNA was precipitated by addition of 0.6 volumes isopropanol, followed by centrifugation at 5000 rcf for 30 mins. The DNA pellet was washed with 200 µL of 80% ethanol, centrifuged at 5000 rcf for 15 mins and dried. The dried DNA pellet was dissolved in 23 µL printing solution containing 50 ng/µL of capture antibody (Amersham), 3.6 mg/mL bovine serum albumin (Sigma) and 2 mM BS3 (Bis[sulfosuccinimidyl] suberate) (Pierce). The

printing solution was transferred to a 384-well printing plate (Genetix) and arrayed onto aminosilane coated glass slides. The printing was performed using a Genetix QArray2 with 300  $\mu\text{m}$  solid tungsten pins and the slides were stored dry at room temperature.

The slides were blocked in Superblock (Pierce) for 1 hour at room temperature, rinsed with double deionized water, and dried using house air. An incubation chamber (Grace Bio.) was applied to the array surface and  $\sim 130 \mu\text{L}$  of the cell-free transcription and translation mix (T7-TNT system, Promega) prepared according to manufacturers instructions were added to the slides. The slides were incubated in a chilling oven (Torrey Pines) at  $30^\circ\text{C}$  for 1.5 hours and 0.5 hours at  $15^\circ\text{C}$ . For protein interactions, the cell free lysate was supplemented with 100-300 ng of query DNA (pANT7\_HA,<sup>27</sup>) and incubated in the chilling incubator at  $30^\circ\text{C}$  for 1.5 hours and 2 hours at  $15^\circ\text{C}$ . Following activation with cell free lysate, the slides were blocked with Blocking Buffer (5% milk in phosphate buffered saline supplemented with 0.2% Tween 20) for 1 hour. For detecting protein expression universally on the array, the slides were incubated with 2 mL of primary monoclonal antibody (10  $\mu\text{g}/\text{mL}$ , mouse anti-GST antibody, Cell Signaling Technologies) and a HRP linked secondary antibody (10  $\mu\text{g}/\text{mL}$  anti-mouse IgG, Amersham) diluted in Blocking Buffer. For detection of specific proteins, the slides were incubated with 2 mL of primary monoclonal antibody (Santa Cruz mouse anti-p53 (D01), Santa Cruz rabbit anti-c-Jun (N), Cell Signaling rabbit anti-c-Fos, Sigma mouse antiCDK4, Sigma mouse anti-p27-KIP1) diluted 1:200 in Blocking Buffer followed by a HRP linked secondary antibody (Jackson goat anti-mouse IgG, Santa Cruz goat anti-rabbit IgG) diluted 1:500 or 1:200 respectively in Blocking Buffer. The incubation with the detection antibodies was carried out using a hybridization chamber (Corning) mixing for 16 hours with the primary antibody at  $4^\circ\text{C}$  and 1

hour at room temperature for the secondary. The slides were rinsed with the Blocking Buffer between the two incubations with the antibodies and finally rinsed with PBS prior to applying the developing solution. The arrays were developed by adding 600  $\mu$ L of the tyramide signal amplification reagent (Perkin Elmer) for 10 mins using a cover slip (Lifterslips, Erie). The slides were rinsed with de-ionized water, dried using house air and scanned with a ProScanArray HT scanner (PerkinElmer). The array images were quantified using the MicroVigene software, version 2.9.9.2 (VigeneTech).

Human kinase list was assembled by mining gene functional and structural annotations in public databases<sup>13,28</sup>. Human Transcription Factors (TF) were assembled by mining the literature about well-studied TF<sup>29</sup> and the literature of genome-scale TF search by sequence similarity<sup>30</sup>. This list was also supplemented by the TFs identified by mining Gene Ontology and other databases such as Swissprot and Genatlas. TM was predicted using TMHMM<sup>31 32</sup> and Sosui<sup>33</sup>.



## Supplementary Protocols

### 1. DNA Minipreps

| <i>Material/Equipment</i>                                          | <b>Amount for one 96-well block</b> |
|--------------------------------------------------------------------|-------------------------------------|
| TB culture medium (KPI+Ampicillin)                                 | 1.5 mL                              |
| 96-pin device (Boekel 140500)                                      | 1                                   |
| Solution 1                                                         | 200 uL/well                         |
| Solution 2                                                         | 200 uL/well                         |
| Solution 3                                                         | 200 uL/well                         |
| Isopropanol                                                        | 600 uL/well                         |
| Solution N2                                                        | 200 uL/well                         |
| Solution N3                                                        | 2000 uL/well                        |
| Solution N5                                                        | 300 uL/well                         |
| 800 uL glass fiber MBPP 25 micron filter plate (Whatman 13503-040) | 1                                   |
| Deep-well block                                                    | 2                                   |
| Gas permeable plate seal                                           | 1                                   |
| Aluminum plate seal                                                | 2                                   |
| ATR Multitron shaker (37°C)                                        | 1                                   |
| Centrifuge, Eppendorf 5810                                         | 1                                   |
| Eppendorf Thermomixer                                              | 1                                   |
| Omni plate (Nunc 242811)                                           |                                     |
| LB                                                                 |                                     |
| Agar                                                               |                                     |
| Sorvall RC12 centrifuge                                            |                                     |
| Sorvall Legend RT centrifuge                                       |                                     |
| 350 uL 96-well plate (Greiner 651201) for alkaline lysis DNA prep  |                                     |
| 800 uL 96-well block (Abgene AB-0859) for Nucleobond prep          |                                     |
| Nucleobond resin (Machery-Nagel custom order)                      |                                     |

- 1) Antibiotic concentrations – Ampicillin (100ug/ml), Chloramphenicol (34 ug/ml), Kanamycin (50ug/ml).
- 2) Create an overnight culture using either LB/Agar or LB liquid cultures.

#### ***LB/Agar culture***

- a. Spot 3ul from the glycerol stock onto a pre-warmed agar plate. Incubate overnight at 37°C.

- b. Sterilize the 96-pin device using 80% ethanol and a flame. Let it cool. Inoculate the blocks (1.5mL of TB) and culture at 37°C with vigorous shaking for 24-26 hours.

3) **Pellet cultures.** Spin blocks for 15 min at 4000rpm /5300 rcf on the Sorvall RC12 centrifuge. After spinning, decant the media from each block into a large bucket or beaker. Blot the decanted blocks, upside-down, on paper-towels spread on the bench-top to remove excess media. Seal each block using an aluminum plate seal and store the blocks at -20°C until needed for DNA purification. The decanted media should be bleached at a final concentration of 5% bleach for 20-30 mins in the fume hood before being discarded.

4) Prepare solutions 1, 2, and 3 according to the following recipes (also available at the end):

**Soln 1: TE Resuspension Buffer**

50 mM Tris pH 8.0 10 mM EDTA (8.0)  
0.1 mg/mL RNase (2ml of Sigma RNase/1L of solution 1)  
Store at 4°C

**Soln 2: NaOH/SDS Lysis Buffer**

0.2 M NaOH  
1% SDS

**Soln 3: KOAC Neutralization Buffer**

2.8 M KOAc  
Glacial Acetic Acid: added until pH is 5.1  
Store at 4°C

5) **Add 200 uL of soln 1** and resuspend by vortexing vigorously. Make sure that no wells contain clumps of bacteria as they will result in low plasmid yield. If unable to disperse by vortexing, then pipette using a P1000.

6) **Add 200 uL of soln 2**, seal the plate with an aluminum seal and gently mix the plate by inverting 4 or 5 times. Carefully time this step from the beginning of soln 2 addition so as not to exceed 5 minutes. Do not shake the plate vigorously as this will result in the undesired shearing of bacterial genomic DNA.

7) **Add 200uL of soln 3**, seal the plate with an aluminum seal and mix the plate by inverting 4 or 5 times. The seal will be loose due to the lysis/neutralization buffers so use caution when inverting.

8) **Spin the block for 20 minutes at 4000rpm/5300 rcf** on the Sorvall RC12 centrifuge to pellet the lysate.

***For Nucleobond anion exchange DNA preparation***

9) Prepare solutions N2, N3, and N5 according to the following recipes (also available at end of protocol):

**Soln N2: Equilibration Buffer**

100 mM Tris 15% EtOH 900 mM KCl 0.15% Triton X-100 Phosphoric Acid: added until pH is 6.3

*To prepare **anion exchange slurry**, add 200ml of N2 buffer to every 100ml of beads.*

**Soln N3: Wash Buffer**

100 mM Tris 15% EtOH  
1.15 M KCl  
Phosphoric Acid: added until pH is 6.3

**Soln N5: Elution Buffer**

100 mM Tris 15% EtOH 1 M KCl Phosphoric Acid: added until pH is 8.5

- 10) **Prepare anion exchange resin plate.** Transfer 400ul of the slurry into each well 25 um Whatman MBPP filter plate. When done, centrifuge at 500 rpm for 5 minutes using the table-top centrifuges.
- 11) **Transfer lysate supernatant to the resin plate**
- 12) **Spin the stacked plates for 10 mins at 300 rpm.**
- 13) **Wash column step.** Place stack plate onto the WellMate and add **500 uL of wash buffer N3** to each well. Alternatively, a 1 mL multi-channel pipette may be used to add the wash buffer. Transfer the resin plate to vacuum manifold to remove wash buffer. **Repeat wash steps 4x.** On the last wash make sure all wells are properly emptied. **Spin the stack plate at 500rpm/750 rcf for 3 mins** using any centrifuge to remove residual wash buffer.
- 14) **Elution.** Place resin plate onto a clean 800 uL collection plate. Place the stacked plates onto the WellMate and add **300 uL of elution buffer N5** to each well. Alternatively, a 1 mL multi-channel pipette may be used to add the elution buffer. Let **sit at RT for ~30 minutes** then **spin the stacked plates for 10 mins at 300 rpm, then 2 mins at 1000 rpm.**
- 15) **Quantitate DNA using UV or fluorescence.**

## 2. Aminosilane slide coating

| <i>Material/Equipment</i>                            | <b>Amount (for 30 slides)</b> |
|------------------------------------------------------|-------------------------------|
| Glass slides (VWR 48300-047)                         | 30                            |
| Acetone 99.9%                                        | 300 mL                        |
| Aminosilane (Pierce 80370)                           | 6 mL                          |
| Metal 30-slide rack (Wheaton 900234) with no handles | 1                             |
| Glass box (Wheaton 900201)                           | 1                             |
| Lock & Lock 1.5 cup boxes (ZHPL810)                  | 1                             |
| Rocking shaker                                       |                               |

- 1) Put 30 slides in each metal rack (remember to fill one extra rack).
- 2) Prepare 300 mL of 2% aminosilane coating solution in glass troughs and cover with saran wrap (6 mL aminosilane in 300 mL acetone – use plastic pipette for silane). *This solution can be used 3-4 times.*
- 3) Treat glass slides in aminosilane coating solution for 15 minutes. Rinse off with acetone in another trough, and then dip in a third trough containing distilled water.
- 4) Dry with filtered compressed air in chemical hood. *Drying pattern as depicted below:*

**3 3 3**

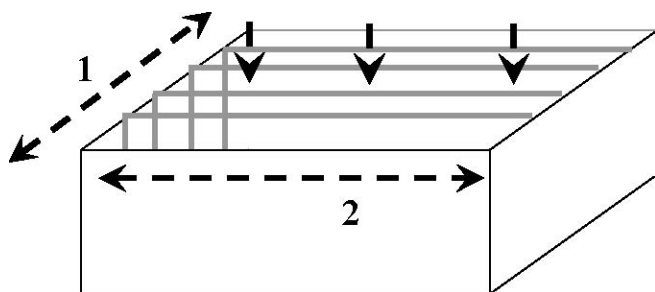

- 1 Longitudinal, along slides
- 2 Along the width of the slides
- 3 Down the edges of the slides

- 5) Store at room temperature in rack in Lock & Lock box. Use within one week.

### 3. Array printing

| <i>Material/Equipment</i>                                            | <b>Amount/well</b> |
|----------------------------------------------------------------------|--------------------|
| Plasmid DNA (from NAPPA DNA prep protocol)                           |                    |
| Sodium acetate (3M, pH 5.5)                                          |                    |
| Isopropanol                                                          |                    |
| Ethanol                                                              |                    |
| 384 well plate for arraying, Genetix x7020                           |                    |
| Polyclonal anti-GST antibody (GE Healthcare/Amersham 27457701)       |                    |
| Polyclonal anti-FLAG antibody (Sigma F7425)                          |                    |
| BS <sub>3</sub> Linker (Pierce 21580)                                |                    |
| Purified GST protein (Sigma G5663)/Flag protein ( )                  |                    |
| Whole mouse IgG antibody (Pierce 31204)                              |                    |
| Centrifuge, Eppendorf 5810                                           |                    |
| QArray2                                                              |                    |
| Silica packets (VWR 100489-246)                                      |                    |
| Genetix Bioassay dish dividers (x6026 divider only; x6027 with dish) |                    |
| Corning deep bioassay dish (431111)                                  |                    |
| WellMate                                                             |                    |
| Eppendorf Thermomixer                                                |                    |

- 1) Take out the DNA plates to be printed from the -20°C freezer and allow them to come to room temperature.
- 2) Precipitate the DNA by **adding 200 uL of isopropanol to each well**. Cover the plate with an aluminum seal and mix by inverting a few times.
- 3) **Centrifuge at 4000rpm for 30 minutes**. Discard the supernatant.
- 4) **Add 400-500 uL of 75% ethanol to each well** using WellMate.
- 5) Centrifuge at 4000rpm for 15 mins at 20°C. Discard the supernatant.
- 6) Dry the plate, uncovered for 10-15 mins. You should not see any alcohol at bottom of well. Seal and centrifuge at 1000 rpm for 2 minutes to bring any pellets down.

**Array sample preparation:**

- 7) **Prepare master mix.** For one 96-well plate prepare approximately 3 mL of master mix. Master mix contains polyclonal antibody (final: 1:100 dilution or 50 ug/mL), BSA (final: 3.6 mg/mL) and BS<sup>3</sup> linker (final: 1.25 mg/mL or 2 mM).

**For GST arrays:**

| Number of 96 well plates | 1      | 4     | 8     | 24    |
|--------------------------|--------|-------|-------|-------|
| Volume needed            | 3ml    | 10ml  | 20ml  | 50ml  |
| BSA (66mg/ml)            | 166.5  | 555   | 1110  | 2775  |
| BS3 linker               | 75     | 250   | 500   | 1250  |
| anti-GST (5mg/ml)        | 30     | 100   | 200   | 500   |
| AC mQ H2O                | 2728.5 | 9095  | 18190 | 45475 |
| Total                    | 3000   | 10000 | 20000 | 50000 |

- 8) Transfer 20ul to each well of the dry DNA pellet. Spin down and shake at 200 rpm for 30-60 minutes.
- 9) **Transfer all 20uL to 384 array plate.**
- 10) Spin the plate down briefly (1500 rpm for 1 minute – to get rid of bubbles).
- 11) **Array** (*see below*) using the appropriate array setup and humidity control approximately 60%.

### Arrayer Setup

- 12) If the 384 well plates for printing were frozen, take them out and allow to come to room temperature.
- 13) **Put blank slides on arrayer, start vacuum and check for no leaks.** If all is good, start humidifier.
- 14) Spin down your 384 well plates at ~1500rpm for 1 minute. Remove foil and place on arrayer deck so that the A1 position is closest to you – bottom right. Check the parameters of the program, and then start it.
- 15) **When arraying is done, place slide labels on the bottom** (non-arrayed) side of each slide. Maintain the slides order on the deck in numerical order.
- 16) **Place the printed slides back in the metal rack,** then place in lock-and-lock boxes along with 1-2 silica packs.

## 4. Detection of the DNA on NAPPA slides

| <i>Material/Equipment</i>         | <b>Amount (for 4 slides)</b> |
|-----------------------------------|------------------------------|
| PicoGreen (Invitrogen P11495)     |                              |
| PicoGreen stock solution          | 33 uL                        |
| SuperBlock                        | 50 mL                        |
| PBS (pH 7.4)                      | 150 mL                       |
| Coverslips, 24 x 60 mm            | 4                            |
| Lifterslips, 24 x 65 mm           | 4                            |
| Rocking shaker                    |                              |
| Scanner, PerkinElmer ProScanArray |                              |

- 1) Block the slides with SuperBlock on a rocking shaker for 30-60 minutes.
- 2) If necessary, prepare PicoGreen stock solution: To the 100 uL/vial that comes, add 200 uL TE buffer, then do a 1:600 dilution in SuperBlock (i.e. for 4 slides, add 33 uL PicoGreen stock solution to 20 mL SuperBlock).
- 3) For a single slide, small array: apply 150 uL PicoGreen mix, and apply coverslip. Let sit for 5 minutes at room temperature. For 4 slides, add 20 mL in a box and shake on rocking shaker for 5 minutes.
- 4) Wash with 1xPBS (pH 7.4) 3 times, ~ 5 min each. Quickly rinse with Milli-Q water.
- 5) Dry with filtered compressed air.
- 6) Scan



## 5. Expression of the NAPPA slides

| <i>Material/Equipment</i>                                                   | <b>Amount<br/>(for 3 slides)</b> |
|-----------------------------------------------------------------------------|----------------------------------|
| HybriWell gaskets (Grace HBW2160-1LA)                                       | 3                                |
| Cell free expression system i.e. rabbit reticulocyte lysate (Promega L4610) | 1 tube                           |
| RNaseOUT (Invitrogen 10777-019)                                             | 8 uL                             |
| DEPC water (Ambion 9906)                                                    | 160 uL                           |
| SuperBlock (Pierce 37535)                                                   | ~30 mL                           |
| Blocking solution: 5% Milk in PBS with 0.2% Tween20                         | ~120 mL                          |
| PBS                                                                         |                                  |
| Programmable chilling incubator, with leveling shelves                      |                                  |
| Rocking shaker                                                              |                                  |
| Genetix Bioassay dish dividers (x6026 divider only; x6027 with dish)        |                                  |
| Corning deep bioassay dish (431111)                                         |                                  |

- 1) Block slides in 30-50ml Superblock for 30-60 minutes.
- 2) Pre-heat the incubator to be used for IVT at 30°C.
- 3) **Rinse with Milli-Q water.** Dry with filtered compressed air.
- 4) **Apply HybriWell gasket** to each slide (align at the top of the slides). Use the wooden stick to rub the areas where the adhesive is to make sure it is stuck to the slide all around.  
*Do not press down too hard, otherwise it will be difficult for the retic to go in.*
- 5) **Prepare IVT.** Each slide will require **130 uL of IVT lysate mix**. Each tube after component addition will contain 400 uL of lysate mix. Since the lysate tubes cannot be re-frozen, always try to express slides in batches of some multiple of three.  
  
e.g. 1 tube = 3 slides = 400 uL -16 uL TNT buffer -8 uL T7 polymerase -4 uL of –Met -4 uL of –Leu or –Cys -168 uL of DEPC water -200 uL of reticulocyte lysate
- 6) **Add IVT mix from the non-label or non-specimen end.** Place the tip against the bottom of the entry port (nearest to the spots) and dispense the IVT quickly into the hybriwell. Gently massage the HybriWell to get the IVT mix to spread down along the slides first then down the center of the slide. When done, wipe the portals dry with gloved hand (not tissue) and apply seal to each portal. Push any bubbles to the edges of the hybriwell.
- 7) **Place the slides on a bioassay dish** with divider on top of the leveling shelf inside the incubator. Incubate for 1.5 hr at 30°C for protein expression (30 is key; 28 or 32 give reduced yield), followed by 30 min at 15°C for the query protein to bind to the immobilized protein.
- 8) Remove the HybriWell and rinse twice with PBS.

9) **Immerse each slide in milk immediately**; wash with milk 3 times, 5 minutes each, in a pipette box. Use about 30 mL milk per wash.

10) **Block with milk** on rocking shaker at room temperature for an additional 30-45 minutes.

## 6. Detection of expression on NAPPA

| <i>Material/Equipment</i>                                              | <b>Amount (for 1 slide)</b> |
|------------------------------------------------------------------------|-----------------------------|
| Primary AB, mouse anti-GST (Cell Signal #2624)                         | 150 uL of stock solution    |
| Primary AB, mouse anti-HA (12CA5, ordered from DFCI)                   | 150 uL of stock solution    |
| Primary AB, mouse anti-Flag (Sigma # )                                 |                             |
| Secondary AB, HRP-conjugated anti-mouse (Amersham NA931)               | 150 uL of stock solution    |
| Secondary AB, HRP-conjugated anti-mouse (Jackson Lab Cat #515-035-062) |                             |
| TSA reagent (PerkinElmer SAT704B001EA)                                 | 150 uL of stock solution    |
| Milk (5% Milk in PBS with 0.2% Tween20)                                | 90 mL for 4 slides at once  |
| PBS (pH 7.4)                                                           | 90 mL for 4 slides at once  |
| Coverslips, 24 x 60 mm (VWR 48393-106)                                 | 3                           |
| Lifterslips, 24 x 65 mm (Erie 25X65I-2-5251-001-LS)                    | 3                           |
| Pipette boxes                                                          | 1                           |
| Scanner, PerkinElmer ProScanArray                                      |                             |

If needed, prepare antibody solutions in 5% milk/PBST:

| Antigen (antibody against) | Dilution factor |
|----------------------------|-----------------|
| GST                        | 300             |
| HA                         | 1000            |
| Mouse IgG (secondary)      | 500             |
|                            |                 |

- 1) **Apply primary AB** (mouse anti-GST, mouse anti-HA or mouse anti-Flag): *Work quickly but do one slide at a time.* Take a slide out of the milk block and tap against a paper towel to get rid of excess milk. Add 600 uL of the primary antibody and **incubate for 1 hr at RT; wash 3x 5 minutes with milk on a rocking shaker.**
- 2) **Apply secondary AB:** *Work quickly but do one slide at a time.* Take a slide out of the milk block and tap against a paper towel to get rid of excess milk. Add 600 uL of the secondary antibody and **incubate for 1 hr at RT; wash 3x 5 minutes with PBS on a rocking shaker.**
- 3) **Dilute the appropriate amount of 50x TSA into the diluent.** The dried TSA tube should be resuspended in 150ul DMSO and vortexed vigorously. This is now the 50x TSA. For each slide, you will need 500ul of 1x TSA (so 10ul of 50x TSA and 500ul of diluent).
- 4) After the last PBS wash, rinse the slides quickly with water and apply 500ul of 1x TSA. Use the lifterslip to spread the TSA across the slide. **Incubate for 10 minutes at room temperature.** Rinse in Milli-Q water; dry with filtered compressed air
- 5) Scan.

## Supplementary Table 1 List of genes printed in figure 2

| GeneID | Gene SymI | Reference | GI |
|--------|-----------|-----------|----|
| 3884   | KRT33B    | 14602964  |    |
| 3661   | IRF3      | 14424769  |    |
| 7266   | DNAJC7    | 15080123  |    |
| 10458  | BAIAP2    | 15559319  |    |
| 5027   | P2RX7     | 15080308  |    |
| 2264   | FGFR4     | 15080147  |    |
| 5350   | PLN       | 13528956  |    |
| 6158   | RPL28     | 14603451  |    |
| 10775  | POP4      | 13325237  |    |
| 5223   | PGAM1     | 15079725  |    |
| 335    | APOA1     | 13529241  |    |
| 79444  | BIRC7     | 15680240  |    |
| 10807  | SDCCAG3   | 15680299  |    |
| 81488  | GRINL1A   | 16306672  |    |
| 1973   | EIF4A1    | 16307019  |    |
| 10606  | PAICS     | 17939424  |    |
| 10146  | G3BP1     | 13937793  |    |
| 79663  | HSPBAP1   | 15080263  |    |
| 59348  | ZNF350    | 14602837  |    |
| 6890   | TAP1      | 15559425  |    |
| 6613   | SUMO2     | 14250086  |    |
| 56993  | TOMM22    | 14424694  |    |
| 400    | ARL1      | 13937800  |    |
| 9077   | DIRAS3    | 13529193  |    |
| 1511   | CTSG      | 15680216  |    |
| 5082   | PDCL      | 16878028  |    |
| 56941  | C3orf37   | 14603027  |    |
| 11116  | FGFR1OP   | 15080275  |    |
| 59307  | SIGIRR    | 13097794  |    |
| 3597   | IL13RA1   | 14602931  |    |
| 5199   | CFP       | 16041750  |    |
| 5547   | PRCP      | 16306647  |    |
| 27067  | STAU2     | 14249966  |    |
| 10318  | TNIP1     | 15559296  |    |
| 9961   | MVP       | 15990477  |    |
| 54205  | CYCS      | 13529022  |    |
| 8996   | NOL3      | 15215393  |    |
| 598    | BCL2L1    | 17939633  |    |
| 25796  | PGLS      | 15559292  |    |
| 29079  | MED4      | 13528773  |    |
| 4191   | MDH2      | 12804928  |    |
| 23770  | FKBP8     | 14602949  |    |
| 51566  | ARMCX3    | 13528785  |    |
| 64172  | OSGEPL1   | 15080281  |    |
| 55081  | IFT57     | 15080266  |    |
| 92745  | SLC38A5   | 17512591  |    |
| 18     | ABAT      | 15990486  |    |
| 10574  | CCT7      | 17939553  |    |

|        |          |          |
|--------|----------|----------|
| 22954  | TRIM32   | 13111962 |
| 5098   | PCDHGC3  | 17939497 |
| 51728  | POLR3K   | 15080354 |
| 6392   | SDHD     | 13528941 |
| 200420 | LOC20042 | 15680270 |
| 56616  | DIABLO   | 15080296 |
| 3113   | HLA-DPA1 | 14602922 |
| 2274   | FHL2     | 17939426 |
| 112942 | CCDC104  | 14603077 |
| 11135  | CDC42EP  | 14424673 |
| 23197  | UBXD8    | 15559283 |
| 4885   | NPTX2    | 14602846 |
| 948    | CD36     | 14250019 |
| 2923   | PDIA3    | 15680172 |
| 51477  | ISYNA1   | 17511981 |
| 57147  | SCYL3    | 15779206 |
| 3630   | INS      | 13528923 |
| 4818   | NKG7     | 16041756 |
| 51226  | COPZ2    | 16198486 |
| 2952   | GSTT1    | 13937910 |
| 3001   | GZMA     | 16041722 |
| 356    | FASLG    | 17028380 |
| 5134   | PDCD2    | 14249982 |
| 5984   | RFC4     | 16924322 |
| 1797   | DOM3Z    | 14424641 |
| 2224   | FDPS     | 14603060 |
| 3662   | IRF4     | 16041743 |
| 51067  | YARS2    | 15990481 |
| 23532  | PRAME    | 15559410 |
| 138151 | BTBD14A  | 15990514 |
| 10131  | TRAP1    | 17511975 |
| 29894  | CPSF1    | 16878040 |
| 6230   | RPS25    | 13436421 |
| 23479  | ISCU     | 15080287 |
| 8766   | RAB11A   | 15426486 |
| 962    | CD48     | 16740596 |
| 3816   | KLK1     | 13529058 |
| 25936  | NSL1     | 13937915 |
| 50855  | PARD6A   | 15990483 |
| 548596 | CKMT1A   | 12804946 |
| 7448   | VTN      | 13477168 |
| 1718   | DHCR24   | 13325123 |
| 2678   | GGT1     | 19684049 |
| 11000  | SLC27A3  | 12804360 |
| 7356   | SCGB1A1  | 13325339 |
| 7319   | UBE2A    | 14603454 |
| 140767 | NRSN1    | 33871592 |
| 3068   | HDGF     | 17512034 |
| 57048  | PLSCR3   | 15079875 |
| 51657  | STYXL1   | 33869206 |
| 653145 | ANXA8    | 13325125 |

|       |          |          |
|-------|----------|----------|
| 10120 | ACTR1B   | 19718809 |
| 10449 | ACAA2    | 12804930 |
| 9806  | SPOCK2   | 33873301 |
| 84527 | ZNF559   | 13623632 |
| 3329  | HSPD1    | 12804340 |
| 10419 | PRMT5    | 19684069 |
| 3792  | KEL      | 13111928 |
| 81    | ACTN4    | 13477150 |
| 83442 | SH3BGR1  | 33879575 |
| 51192 | CKLF     | 13325133 |
| 7291  | TWIST1   | 33871573 |
| 55038 | CDCA4    | 15079878 |
| 6678  | SPARC    | 13436388 |
| 9424  | KCNK6    | 13325107 |
| 23780 | APOL2    | 13325155 |
| 5595  | MAPK3    | 15559270 |
| 25937 | WWTR1    | 15559367 |
| 4236  | MFAP1    | 33873330 |
| 57175 | CORO1B   | 13623648 |
| 50615 | IL21R    | 13279298 |
| 9531  | BAG3     | 13623600 |
| 161   | AP2A2    | 13544040 |
| 10209 | EIF1     | 13477288 |
| 10728 | PTGES3   | 12804292 |
| 79727 | LIN28    | 33872076 |
| 79666 | PLEKHF2  | 15080048 |
| 11316 | COPE     | 13111964 |
| 64422 | ATG3     | 33872933 |
| 10468 | FST      | 13278647 |
| 55486 | PARL     | 15559381 |
| 90780 | PYGO2    | 33991480 |
| 26277 | TINF2    | 13477144 |
| 678   | ZFP36L2  | 13477110 |
| 10645 | CAMKK2   | 33991300 |
| 84795 | C10orf33 | 13543987 |
| 56848 | SPHK2    | 13544054 |
| 9810  | RNF40    | 13543993 |
| 6218  | RPS17    | 14424804 |
| 6135  | RPL11    | 17512000 |
| 60436 | TGIF2    | 33870164 |
| 8125  | ANP32A   | 13938167 |
| 7351  | UCP2     | 15079881 |
| 10237 | SLC35B1  | 15080237 |
| 79814 | AGMAT    | 13477244 |
| 2353  | FOS      | 13325363 |
| 51177 | PLEKHO1  | 14603393 |
| 8175  | SF3A2    | 13325229 |
| 84749 | USP30    | 13436088 |
| 83939 | EIF2A    | 15080228 |
| 4318  | MMP9     | 13543892 |
| 5211  | PFKL     | 13623608 |

|        |          |          |
|--------|----------|----------|
| 6829   | SUPT5H   | 18848307 |
| 8712   | PAGE1    | 13436067 |
| 80306  | MED28    | 15080366 |
| 54738  | FEV      | 33871725 |
| 10370  | CITED2   | 13325127 |
| 9255   | SCYE1    | 15559364 |
| 5308   | PITX2    | 17315123 |
| 55326  | AGPAT5   | 33879276 |
| 5036   | PA2G4    | 12804994 |
| 898    | CCNE1    | 33879911 |
| 10955  | SERINC3  | 13543883 |
| 3615   | IMPDH2   | 13543972 |
| 9517   | SPTLC2   | 13477298 |
| 51429  | SNX9     | 13477130 |
| 6272   | SORT1    | 23272117 |
| 4258   | MGST2    | 19343540 |
| 56940  | DUSP22   | 33872098 |
| 5721   | PSME2    | 13325109 |
| 1312   | COMT     | 15080363 |
| 8717   | TRADD    | 13325366 |
| 2355   | FOSL2    | 18605531 |
| 4778   | NFE2     | 13477164 |
| 3053   | SERPIND1 | 23273329 |
| 54606  | DDX56    | 12654784 |
| 29127  | RACGAP1  | 21595804 |
| 57338  | JPH3     | 22328099 |
| 4438   | MSH4     | 21542525 |
| 9871   | SEC24D   | 23273493 |
| 5440   | POLR2K   | 12654012 |
| 26225  | ARL5A    | 12654822 |
| 10287  | RGS19    | 12654940 |
| 5694   | PSMB6    | 12654058 |
| 55211  | DPPA4    | 23271562 |
| 4115   | MAGEB4   | 23273911 |
| 140625 | ACTRT2   | 20809587 |
| 92283  | ZNF461   | 20306350 |
| 5929   | RBBP5    | 22713403 |
| 84958  | SYTL1    | 23274197 |
| 56903  | PAPOLB   | 22477166 |
| 11108  | PRDM4    | 23272563 |
| 29940  | DSE      | 24659665 |
| 51284  | TLR7     | 21708074 |
| 84419  | C15orf48 | 18088945 |
| 998    | CDC42    | 13277547 |
| 142679 | DUSP19   | 23273914 |
| 64710  | NUCKS1   | 12654010 |
| 4969   | OGN      | 22713595 |
| 26499  | PLEK2    | 12654766 |
| 10672  | GNA13    | 22478059 |
| 6790   | AURKA    | 12654872 |
| 10130  | PDIA6    | 12654930 |

|        |          |          |
|--------|----------|----------|
| 170384 | FUT11    | 23271235 |
| 79070  | KDELC1   | 12654902 |
| 3036   | HAS1     | 23243101 |
| 199720 | GGN      | 23271255 |
| 8336   | HIST1H2A | 21595675 |
| 10519  | CIB1     | 12654074 |
| 222662 | LHFPL5   | 20306955 |
| 3029   | HAGH     | 12654064 |
| 23640  | HSPBP1   | 12654786 |
| 3491   | CYR61    | 12654854 |
| 6741   | SSB      | 12654890 |
| 94031  | HTRA3    | 23273037 |
| 56852  | RAD18    | 12654912 |
| 7189   | TRAF6    | 21410268 |
| 220965 | FAM13C1  | 22209064 |
| 8711   | TNK1     | 23273501 |
| 143689 | PIWIL4   | 21410560 |
| 22883  | CLSTN1   | 21706695 |
| 8483   | CILP     | 23272760 |
| 220202 | ATOH7    | 21618609 |
| 1176   | AP3S1    | 12654008 |
| 6427   | SFRS2    | 12654914 |
| 122011 | CSNK1A1L | 20380987 |
| 57007  | CXCR7    | 22477172 |
| 9577   | BRE      | 12654816 |
| 2672   | GFI1     | 21618435 |
| 159163 | RBMY1F   | 20987384 |
| 7179   | TPTE     | 20379672 |
| 6529   | SLC6A1   | 21707907 |
| 2581   | GALC     | 22328078 |
| 56159  | TEX11    | 23271197 |
| 868    | CBLB     | 23273908 |
| 9338   | TCEAL1   | 12654018 |
| 6203   | RPS9     | 12654004 |
| 79074  | C2orf49  | 12654926 |
| 362    | AQP5     | 21432082 |
| 10238  | WDR68    | 12654840 |
| 84690  | SPATA22  | 20810259 |
| 4886   | NPY1R    | 22477780 |
| 5609   | MAP2K7   | 23468314 |
| 29970  | SCHIP1   | 23306469 |
| 10346  | TRIM22   | 23272542 |
| 9655   | SOCS5    | 23273933 |
| 11226  | GALNT6   | 23274203 |
| 4047   | LSS      | 23242913 |
| 729    | C6       | 23273481 |
| 9738   | CP110    | 22477168 |
| 1854   | DUT      | 21708113 |
| 79817  | MOBKL2B  | 21542523 |
| 143684 | FAM76B   | 19683969 |
| 6418   | SET      | 21618460 |



|        |          |          |
|--------|----------|----------|
| 2865   | FFAR3    | 23272748 |
| 6455   | SH3GL1   | 12654852 |
| 79075  | DCC1     | 12654936 |
| 3107   | HLA-C    | 12803294 |
| 95     | ACY1     | 12653544 |
| 1487   | CTBP1    | 15079677 |
| 1650   | DDOST    | 12803530 |
| 6170   | RPL39    | 12654388 |
| 23484  | LEPROTL1 | 12653714 |
| 51155  | HN1      | 12655134 |
| 57095  | C1orf128 | 16877980 |
| 51616  | TAF9B    | 16306982 |
| 203260 | CCDC107  | 17511815 |
| 9524   | GPSN2    | 12803228 |
| 2702   | GJA5     | 15426425 |
| 633    | BGN      | 12803216 |
| 570    | BAAT     | 16306984 |
| 1813   | DRD2     | 18203702 |
| 7922   | SLC39A7  | 12653720 |
| 79147  | FKRP     | 12803560 |
| 56897  | WRNIP1   | 17511929 |
| 51393  | TRPV2    | 17511937 |
| 2785   | GNG3     | 15990403 |
| 4713   | NDUFB7   | 12803532 |
| 9045   | RPL14    | 12653648 |
| 10197  | PSME3    | 12655138 |
| 8544   | PIR      | 12803390 |
| 6236   | RRAD     | 15079657 |
| 5031   | P2RY6    | 12653590 |
| 3133   | HLA-E    | 12803502 |
| 9672   | SDC3     | 15559238 |
| 57109  | REXO4    | 14424508 |
| 26271  | FBXO5    | 17511910 |
| 4319   | MMP10    | 12803526 |
| 56606  | SLC2A9   | 17511905 |
| 4313   | MMP2     | 12803498 |
| 5214   | PFKP     | 12803424 |
| 1340   | COX6B1   | 12654382 |
| 29097  | CNIH4    | 12653594 |
| 3251   | HPRT1    | 12653602 |
| 10228  | STX6     | 14602897 |
| 896    | CCND3    | 15079590 |
| 55041  | PLEKHB2  | 12655146 |
| 51131  | PHF11    | 16877992 |
| 4938   | OAS1     | 12653574 |
| 2852   | GPER     | 15079632 |
| 3764   | KCNJ8    | 12653542 |
| 5118   | PCOLCE   | 12653596 |
| 1816   | DRD5     | 14602484 |
| 28232  | SLCO3A1  | 12653614 |
| 6282   | S100A11  | 12655116 |

|        |          |          |
|--------|----------|----------|
| 11039  | SMA4     | 12803576 |
| 2760   | GM2A     | 14424506 |
| 4722   | NDUFS3   | 12653668 |
| 10980  | COPS6    | 12803394 |
| 11343  | MGLL     | 12653554 |
| 2784   | GNB3     | 12803276 |
| 29995  | LMCD1    | 12653722 |
| 80142  | PTGES2   | 15079582 |
| 2149   | F2R      | 12803296 |
| 7283   | TUBG1    | 12653672 |
| 5476   | CTSA     | 12653638 |
| 4285   | MIPEP    | 14602870 |
| 7272   | TTK      | 12653696 |
| 192286 | HIGD2A   | 12653618 |
| 10267  | RAMP1    | 12653550 |
| 8407   | TAGLN2   | 12803566 |
| 7458   | EIF4H    | 18204591 |
| 7390   | UROS     | 12803492 |
| 5309   | PITX3    | 15079650 |
| 663    | BNIP2    | 12803290 |
| 5192   | PEX10    | 12653540 |
| 51006  | SLC35C2  | 18089293 |
| 3206   | HOXA10   | 15559234 |
| 8841   | HDAC3    | 12653662 |
| 23549  | DNPEP    | 12653734 |
| 5777   | PTPN6    | 12803400 |
| 51361  | HOOK1    | 15079604 |
| 23765  | IL17RA   | 15079610 |
| 6231   | RPS26    | 12803548 |
| 10577  | NPC2     | 12803416 |
| 8934   | RAB7L1   | 12803516 |
| 5860   | QDPR     | 12653600 |
| 51010  | EXOSC3   | 12803246 |
| 5531   | PPP4C    | 12655126 |
| 51465  | UBE2J1   | 15559236 |
| 59338  | PLEKHA1  | 12654600 |
| 3646   | EIF3E    | 12653884 |
| 3663   | IRF5     | 13278719 |
| 5170   | PDPK1    | 15082378 |
| 9429   | ABCG2    | 33879135 |
| 629    | CFB      | 13278731 |
| 29967  | LRP12    | 21594265 |
| 78988  | MRP63    | 23273804 |
| 10578  | GNLY     | 23270801 |
| 4358   | MPV17    | 12654560 |
| 5479   | PPIB     | 12654578 |
| 3119   | HLA-DQB1 | 15082384 |
| 2631   | GBAS     | 12653880 |
| 2091   | FBL      | 17939434 |
| 9455   | HOMER2   | 15082390 |
| 9262   | STK17B   | 16359142 |

|        |          |          |
|--------|----------|----------|
| 94240  | EPSTI1   | 33878618 |
| 7849   | PAX8     | 12654464 |
| 991    | CDC20    | 12654516 |
| 6512   | SLC1A7   | 15082407 |
| 6786   | STIM1    | 20987364 |
| 91039  | DPP9     | 33991522 |
| 2315   | MLANA    | 15680156 |
| 122769 | PPIL5    | 33988785 |
| 84522  | JAGN1    | 33874712 |
| 57801  | HES4     | 15214448 |
| 112464 | PRKCDBP  | 15079511 |
| 3162   | HMOX1    | 16306630 |
| 91603  | CCDC16   | 15079508 |
| 5029   | P2RY2    | 15082380 |
| 5973   | RENBP    | 15990396 |
| 1674   | DES      | 33878070 |
| 6518   | SLC2A5   | 13111710 |
| 3735   | KARS     | 13278704 |
| 11322  | TMC6     | 33879921 |
| 27044  | SND1     | 16877908 |
| 6866   | TAC3     | 33879669 |
| 4069   | LYZ      | 13278743 |
| 10201  | NME6     | 12804744 |
| 9592   | IER2     | 13177684 |
| 3732   | CD82     | 12653868 |
| 8624   | DSCR2    | 13177669 |
| 124540 | MSI2     | 16306701 |
| 56256  | SERTAD4  | 15082345 |
| 23746  | AIPL1    | 15082298 |
| 9514   | GAL3ST1  | 15779171 |
| 126321 | C19orf28 | 33991499 |
| 6692   | SPINT1   | 13278722 |
| 83746  | L3MBTL2  | 16877934 |
| 5125   | PCSK5    | 15082316 |
| 51504  | HSPC152  | 16877889 |
| 1984   | EIF5A    | 12653914 |
| 55863  | TMEM126f | 15082318 |
| 205    | AK3L1    | 16740594 |
| 9801   | MRPL19   | 20987268 |
| 9478   | CABP1    | 21955445 |
| 5892   | RAD51L3  | 15680154 |
| 6693   | SPN      | 15214445 |
| 5001   | ORC5L    | 33991585 |
| 8694   | DGAT1    | 23273785 |
| 51678  | MPP6     | 33879924 |
| 10061  | ABCF2    | 12804500 |
| 9188   | DDX21    | 13278830 |
| 10892  | MALT1    | 33879606 |
| 4522   | MTHFD1   | 14602584 |
| 3956   | LGALS1   | 12804556 |
| 10467  | ZNHIT1   | 33878030 |

|        |          |          |
|--------|----------|----------|
| 83755  | KRTAP4-1 | 13278824 |
| 7534   | YWHAZ    | 13177678 |
| 22924  | MAPRE3   | 15079433 |
| 10921  | RNPS1    | 12804496 |
| 3460   | IFNGR2   | 13177681 |
| 4982   | TNFRSF11 | 33878056 |
| 5326   | PLAGL2   | 33988277 |
| 9197   | SLC33A1  | 15680145 |
| 6535   | SLC6A8   | 15214459 |
| 117246 | FTSJ3    | 23331071 |
| 57549  | IGSF9    | 33879604 |
| 1382   | CRABP2   | 12654550 |
| 84153  | RNASEH2  | 33874513 |
| 3148   | HMGB2    | 12654470 |
| 81472  | OR2C3    | 21315036 |
| 3476   | IGBP1    | 13278713 |
| 84725  | PLEKHA8  | 12803978 |
| 83540  | NUF2     | 14250143 |
| 5327   | PLAT     | 13938220 |
| 51132  | RNF12    | 15426503 |
| 4176   | MCM7     | 15426527 |
| 5441   | POLR2L   | 13543491 |
| 2117   | ETV3     | 18605788 |
| 1327   | COX4I1   | 14250513 |
| 389    | RHOC     | 13938242 |
| 51510  | CHMP5    | 13937758 |
| 10556  | RPP30    | 13937783 |
| 931    | MS4A1    | 12803920 |
| 64805  | P2RY12   | 17389766 |
| 84517  | ARPM1    | 13938318 |
| 29763  | PACSIN3  | 14043957 |
| 8463   | TEAD2    | 14043136 |
| 6663   | SOX10    | 12803952 |
| 311    | ANXA11   | 14043152 |
| 8659   | ALDH4A1  | 14043186 |
| 26986  | PABPC1   | 16358989 |
| 57325  | CSRP2BP  | 14043102 |
| 9502   | XAGE2    | 14328031 |
| 5320   | PLA2G2A  | 13543520 |
| 80218  | NAT13    | 15215283 |
| 5052   | PRDX1    | 13937906 |
| 5553   | PRG2     | 13543541 |
| 10136  | ELA3A    | 13937847 |
| 55     | ACPP     | 14250149 |
| 3624   | INHBA    | 14043814 |
| 5671   | PSG3     | 13543532 |
| 55929  | DMAP1    | 12804006 |
| 81607  | PVRL4    | 14714573 |
| 84838  | ZNF496   | 13938273 |
| 55768  | NGLY1    | 13938210 |
| 56949  | XAB2     | 13938178 |

|        |          |          |
|--------|----------|----------|
| 154791 | C7orf55  | 14250109 |
| 3043   | HBB      | 13937928 |
| 969    | CD69     | 13937862 |
| 1155   | TBCB     | 13543641 |
| 7416   | VDAC1    | 14250131 |
| 10273  | STUB1    | 14043118 |
| 5013   | OTX1     | 14043259 |
| 654817 | NCF1C    | 12803938 |
| 79102  | RNF26    | 14043098 |
| 2968   | GTF2H4   | 13436277 |
| 54971  | BANP     | 14495633 |
| 279    | AMY2A    | 13937900 |
| 81533  | ITFG1    | 18848294 |
| 11132  | CAPN10   | 13279049 |
| 57062  | DDX24    | 14250755 |
| 5439   | POLR2J   | 18848195 |
| 221079 | ARL5B    | 18848192 |
| 397    | ARHGDIB  | 14327951 |
| 64231  | MS4A6A   | 18605535 |
| 2705   | GJB1     | 12803916 |
| 51534  | VTA1     | 13937779 |
| 771    | CA12     | 18645128 |
| 79412  | KREMEN2  | 13097629 |
| 9039   | UBE1C    | 18605782 |
| 10404  | PGCP     | 18088383 |
| 7984   | ARHGEF5  | 15778952 |
| 28976  | ACAD9    | 14044101 |
| 7047   | TGM4     | 13937805 |
| 6522   | SLC4A2   | 14495651 |
| 81631  | MAP1LC3E | 17391392 |
| 1054   | CEBPG    | 14043188 |
| 79706  | PRKRIP1  | 15679979 |
| 4801   | NFYB     | 13529070 |
| 10481  | HOXB13   | 13937957 |
| 8613   | PPAP2B   | 14327943 |
| 55968  | NSFL1C   | 12803908 |
| 751867 | SNHG3-RC | 13938340 |
| 10195  | ALG3     | 12803980 |
| 3142   | HLX      | 13938328 |
| 84962  | JUB      | 14043184 |
| 5105   | PCK1     | 18645160 |
| 4605   | MYBL2    | 14043193 |
| 5336   | PLCG2    | 14043154 |
| 2170   | FABP3    | 13937836 |
| 51506  | UFC1     | 13528770 |
| 6013   | RLN1     | 13543608 |
| 5997   | RGS2     | 13937881 |
| 81285  | OR51E2   | 18088468 |
| 79603  | LASS4    | 14602620 |
| 409    | ARRB2    | 13938554 |
| 4723   | NDUFV1   | 15990510 |

|        |          |          |
|--------|----------|----------|
| 23786  | BCL2L13  | 14043325 |
| 3831   | KLC1     | 14250821 |
| 51703  | ACSL5    | 14124925 |
| 4678   | NASP     | 14603291 |
| 118425 | GDEP     | 18088729 |
| 3015   | H2AFZ    | 17389987 |
| 65108  | MARCKSL  | 14043933 |
| 4618   | MYF6     | 17389611 |
| 140578 | CHODL    | 14495622 |
| 4157   | MC1R     | 14043808 |
| 54328  | GPR173   | 14602675 |
| 53831  | GPR84    | 18089044 |
| 9689   | BZW1     | 20071147 |
| 2937   | GSS      | 14043990 |
| 60678  | EEFSEC   | 14044000 |
| 84859  | LRCH3    | 13960125 |
| 1013   | CDH15    | 14286299 |
| 5569   | PKIA     | 34784773 |
| 9349   | RPL23    | 14603312 |
| 1647   | GADD45A  | 15079933 |
| 6882   | TAF11    | 18314397 |
| 7167   | TPI1     | 14043687 |
| 7168   | TPM1     | 13938564 |
| 3659   | IRF1     | 14550468 |
| 2752   | GLUL     | 14603140 |
| 51268  | PIPOX    | 14286317 |
| 845    | CASQ2    | 18490362 |
| 10494  | STK25    | 14043796 |
| 25814  | ATXN10   | 13960134 |
| 4774   | NFIA     | 18490342 |
| 55802  | DCP1A    | 13938576 |
| 823    | CAPN1    | 14250592 |
| 93627  | MGC1616  | 14327966 |
| 57819  | LSM2     | 14327935 |
| 4192   | MDK      | 15079797 |
| 403    | ARL3     | 14602643 |
| 666    | BOK      | 13623212 |
| 113130 | CDCA5    | 15012189 |
| 114898 | C1QTNF2  | 15079785 |
| 27122  | DKK3     | 14043329 |
| 11321  | XAB1     | 13938598 |
| 89884  | LHX4     | 15079939 |
| 10491  | CRTAP    | 14250580 |
| 6794   | STK11    | 14124917 |
| 471    | ATIC     | 14250817 |
| 3098   | HK1      | 14250553 |
| 7341   | SUMO1    | 13623670 |
| 58505  | DC2      | 16740922 |
| 84932  | RAB2B    | 18088785 |
| 80146  | UXS1     | 14602606 |
| 1468   | SLC25A10 | 13938430 |

9114 ATP6V0D1 14250783  
60491 NIF3L1 14043316  
27316 RBMX 13938568  
5104 SERPINA5 14286237  
57003 CCDC47 14286217  
51130 ASB3 13623716  
28511 NKIRAS2 13938596  
2596 GAP43 14044009  
93107 KCNG4 14286334  
92856 IMP4 14603152  
10614 HEXIM1 13623668  
419 ART3 17389806  
51808 RNUXA 18089303  
91304 C19orf6 14286311  
51540 SCLY 14043900  
9943 OXSR1 14250547  
7088 TLE1 14603280  
26999 CYFIP2 15079948  
5438 POLR2I 16877748  
6205 RPS11 14044036  
1535 CYBA 13623676  
51538 ZCCHC17 13938588  
6382 SDC1 14250611  
84824 FCRLA 13676371  
468 ATF4 14198041  
5573 PRKAR1A 23273779  
56923 NMUR2 16877376  
8503 PIK3R3 20987208  
5360 PLTP 18044751  
5019 OXCT1 14290471  
131566 DCBLD2 20988614  
3480 IGF1R 14714901  
9616 RNF7 14250388  
810 CALML3 21619432  
118426 LOH12CR 15489113  
11015 KDEL3 12654866  
6770 STAR 14714802  
328 APEX1 14198173  
10055 SAE1 17390637  
5494 PPM1A 20070651  
9051 PSTPIP1 14250342  
10475 TRIM38 20070648  
710 SERPING1 15029893  
6646 SOAT1 20809439  
2260 FGFR1 22450877  
4504 MT3 15341817  
4062 LY6H 20810023  
83998 REG4 16877696  
8738 CRADD 16877580  
5868 RAB5A 12654846  
80011 NIP30 18088224

|        |          |          |
|--------|----------|----------|
| 27092  | CACNG4   | 21961609 |
| 2582   | GALE     | 12654858 |
| 90952  | ESAM     | 16877212 |
| 51447  | IHPK2    | 18043110 |
| 8797   | TNFRSF10 | 15277526 |
| 51271  | UBAP1    | 18088060 |
| 2239   | GPC4     | 23398481 |
| 6277   | S100A6   | 14290497 |
| 3040   | HBA2     | 14250290 |
| 10534  | SSSCA1   | 15928645 |
| 283748 | PLA2G4D  | 21961640 |
| 116448 | OLIG1    | 23271032 |
| 23788  | MTCH2    | 12654120 |
| 112479 | EXOD1    | 14714720 |
| 11344  | TWF2     | 16741224 |
| 55559  | UCHL5IP  | 14198167 |
| 11326  | VSIG4    | 14714758 |
| 64093  | SMOC1    | 14250354 |
| 9314   | KLF4     | 20987475 |
| 79934  | ADCK4    | 20071711 |
| 26517  | TIMM13   | 14250352 |
| 11170  | FAM107A  | 14714820 |
| 146395 | GSG1L    | 19116249 |
| 6193   | RPS5     | 17390333 |
| 4189   | DNAJB9   | 20809326 |
| 29902  | C12orf24 | 18088080 |
| 55146  | ZDHHC4   | 12654792 |
| 63943  | FKBPL    | 15080434 |
| 3284   | HSD3B2   | 23468232 |
| 127435 | PODN     | 22418048 |
| 5521   | PPP2R2B  | 21619304 |
| 1968   | EIF2S3   | 18044759 |
| 54407  | SLC38A2  | 25955654 |
| 60681  | FKBP10   | 16741259 |
| 9138   | ARHGEF1  | 21707582 |
| 140576 | S100A16  | 14714784 |
| 60370  | AVPI1    | 12654124 |
| 754    | PTTG1IP  | 18088698 |
| 26291  | FGF21    | 22450793 |
| 7079   | TIMP4    | 14714808 |
| 54472  | TOLLIP   | 17390640 |
| 3293   | HSD17B3  | 21706851 |
| 1947   | EFNB1    | 19116187 |
| 728    | C5AR1    | 14290435 |
| 113878 | DTX2     | 14250773 |
| 27352  | RUTBC3   | 14165548 |
| 163    | AP2B1    | 13623210 |
| 6224   | RPS20    | 13960132 |
| 5147   | PDE6D    | 14043740 |
| 3563   | IL3RA    | 23273418 |
| 11278  | KLF12    | 18043612 |



|        |          |          |
|--------|----------|----------|
| 11153  | HYPE     | 12654988 |
| 64518  | TEKT3    | 21618791 |
| 2073   | ERCC5    | 34192346 |
| 2919   | CXCL1    | 15080461 |
| 10857  | PGRMC1   | 21707708 |
| 112950 | MED8     | 14714788 |
| 2706   | GJB2     | 16877591 |
| 958    | CD40     | 15214586 |
| 6175   | RPLP0    | 14198047 |
| 1454   | CSNK1E   | 13676317 |
| 10226  | M6PRBP1  | 13543306 |
| 51004  | COQ6     | 15559648 |
| 4747   | NEFL     | 24658017 |
| 64849  | SLC13A3  | 23243409 |
| 9695   | EDEM1    | 17512211 |
| 10291  | SF3A1    | 14043384 |
| 83758  | RBP5     | 20810176 |
| 5478   | PPIA     | 12653800 |
| 5867   | RAB4A    | 12803248 |
| 4359   | MPZ      | 13676319 |
| 56670  | SUCNR1   | 21410927 |
| 55269  | PSPC1    | 15559655 |
| 23471  | TRAM1    | 12653796 |
| 51547  | SIRT7    | 16878202 |
| 3916   | LAMP1    | 18204185 |
| 26284  | ERAL1    | 17512226 |
| 3856   | KRT8     | 12653736 |
| 7982   | ST7      | 21410647 |
| 369    | ARAF     | 12803300 |
| 583    | BBS2     | 15559554 |
| 10025  | MED16    | 16878151 |
| 3020   | H3F3A    | 20810209 |
| 5281   | PIGF     | 20809501 |
| 1861   | TOR1A    | 12653776 |
| 100    | ADA      | 14043372 |
| 10121  | ACTR1A   | 12653808 |
| 10617  | STAMPB   | 14043381 |
| 84056  | KATNAL1  | 12653658 |
| 92922  | CCDC102  | 14249826 |
| 23616  | SH3BP1   | 14249820 |
| 7520   | XRCC5    | 17512092 |
| 8361   | HIST1H4F | 16878338 |
| 51121  | RPL26L1  | 16878335 |
| 399    | RHOH     | 17315201 |
| 11018  | TMED1    | 12803256 |
| 3386   | ICAM4    | 20810185 |
| 115330 | GPR146   | 15559780 |
| 9573   | GDF3     | 21410191 |
| 2319   | FLOT2    | 16878172 |
| 84957  | RELT     | 16878143 |
| 83743  | GRWD1    | 12803252 |

|        |          |          |
|--------|----------|----------|
| 26574  | AATF     | 12653626 |
| 6545   | SLC7A4   | 14250695 |
| 55760  | DHX32    | 12803310 |
| 5424   | POLD1    | 14250669 |
| 6993   | DYNLT1   | 20809506 |
| 57085  | AGTRAP   | 16878259 |
| 3535   | IGL@     | 21410210 |
| 1773   | DNASE1   | 20810453 |
| 55577  | NAGK     | 12654406 |
| 6617   | SNAPC1   | 17512114 |
| 9404   | LPXN     | 17512108 |
| 6839   | SUV39H1  | 13623276 |
| 64969  | MRPS5    | 15559627 |
| 64840  | PORCN    | 17512192 |
| 224    | ALDH3A2  | 12803234 |
| 8318   | CDC45L   | 13623264 |
| 5126   | PCSK2    | 13543297 |
| 3689   | ITGB2    | 13543406 |
| 7297   | TYK2     | 15559783 |
| 6160   | RPL31    | 16878294 |
| 6152   | RPL24    | 12653802 |
| 7423   | VEGFB    | 14250701 |
| 53405  | CLIC5    | 23273551 |
| 433    | ASGR2    | 16878087 |
| 7918   | BAT4     | 14250637 |
| 27235  | COQ2     | 14250675 |
| 7260   | TSSC1    | 12803332 |
| 11148  | HLA2     | 23272002 |
| 2027   | ENO3     | 16878082 |
| 3839   | KPNA3    | 16878322 |
| 4478   | MSN      | 16878175 |
| 8880   | FUBP1    | 16878076 |
| 4017   | LOXL2    | 12653632 |
| 4796   | NFKBIL2  | 14250635 |
| 150590 | C2orf15  | 18204634 |
| 5376   | PMP22    | 17512120 |
| 5684   | PSMA3    | 20810438 |
| 30012  | TLX3     | 16878170 |
| 30968  | STOML2   | 12803254 |
| 8531   | CSDA     | 14250671 |
| 26003  | GORASP2  | 14043582 |
| 1736   | DKC1     | 14602858 |
| 2053   | EPHX2    | 14043437 |
| 10956  | OS9      | 12653520 |
| 84812  | PLCD4    | 13623500 |
| 51372  | CCDC72   | 12654536 |
| 27129  | HSPB7    | 13623438 |
| 6133   | RPL9     | 12653424 |
| 2950   | GSTP1    | 15012035 |
| 2275   | FHL3     | 12655006 |
| 60386  | SLC25A19 | 12654490 |

|       |          |          |
|-------|----------|----------|
| 6652  | SORD     | 18088047 |
| 5195  | PEX14    | 13623452 |
| 11041 | B3GNT1   | 18314365 |
| 10045 | SH2D3A   | 13623359 |
| 79796 | ALG9     | 14328091 |
| 27229 | 76P      | 15215402 |
| 3030  | HADHA    | 14328040 |
| 1163  | CKS1B    | 14043534 |
| 29089 | UBE2T    | 13278752 |
| 3821  | KLRC1    | 15214825 |
| 3078  | CFHR1    | 16876960 |
| 3964  | LGALS8   | 16198352 |
| 8424  | BBOX1    | 15029650 |
| 1477  | CSTF1    | 12654374 |
| 4731  | NDUFV3   | 18203722 |
| 6570  | SLC18A1  | 13623434 |
| 8883  | APPBP1   | 12653418 |
| 57617 | VPS18    | 16306677 |
| 84811 | BUD13    | 13623490 |
| 3693  | ITGB5    | 16306830 |
| 9506  | PAGE4    | 15012004 |
| 11075 | STMN2    | 13623412 |
| 51501 | C11orf73 | 12804532 |
| 65987 | KCTD14   | 12654468 |
| 4232  | MEST     | 12803210 |
| 26762 | HAVCR1   | 15426446 |
| 2039  | EPB49    | 13623436 |
| 5316  | PKNOX1   | 14043519 |
| 1128  | CHRM1    | 14043504 |
| 53371 | NUP54    | 15214834 |
| 22948 | CCT5     | 16306836 |
| 7430  | VIL2     | 15530242 |
| 25913 | POT1     | 12804138 |
| 51512 | GTSE1    | 13623450 |
| 996   | CDC27    | 15079680 |
| 5266  | PI3      | 15012094 |
| 3481  | IGF2     | 12653518 |
| 51207 | DUSP13   | 14602534 |
| 2348  | FOLR1    | 12804178 |
| 11266 | DUSP12   | 13623373 |
| 56944 | OLFML3   | 14602834 |
| 55846 | ITFG2    | 16306861 |
| 3032  | HADHB    | 17068369 |
| 9118  | INA      | 13623506 |
| 30844 | EHD4     | 13623376 |
| 5518  | PPP2R1A  | 16306716 |
| 6051  | RNPEP    | 12654472 |
| 2617  | GARS     | 14043543 |
| 9382  | COG1     | 18314386 |
| 10249 | GLYAT    | 14602548 |
| 467   | ATF3     | 13623444 |

|       |          |          |
|-------|----------|----------|
| 83463 | MXD3     | 12653904 |
| 23551 | RASD2    | 15426590 |
| 81621 | KAZALD1  | 14043549 |
| 55662 | HIF1AN   | 14043455 |
| 3419  | IDH3A    | 18314367 |
| 6005  | RHAG     | 15214944 |
| 4247  | MGAT2    | 13623554 |
| 29997 | GLTSCR2  | 13623422 |
| 11137 | PWP1     | 12804486 |
| 9322  | TRIP10   | 15278146 |
| 10324 | KBTBD10  | 16306812 |
| 9091  | PIGQ     | 13623536 |
| 8449  | DHX16    | 14250711 |
| 81579 | PLA2G12A | 16878004 |
| 8817  | FGF18    | 13623288 |
| 3205  | HOXA9    | 16306818 |
| 7126  | TNFAIP1  | 12804470 |
| 79723 | SUV39H2  | 14043540 |
| 3772  | KCNJ15   | 15426449 |
| 9266  | PSCD2    | 13279334 |
| 1267  | CNP      | 12655028 |
| 9136  | RRP9     | 12654556 |
| 23636 | NUP62    | 13177792 |
| 10133 | OPTN     | 15530202 |
| 3835  | KIF22    | 13279307 |
| 4172  | MCM3     | 12804438 |
| 4489  | MT1A     | 20809974 |
| 3557  | IL1RN    | 14602478 |
| 203   | AK1      | 12654562 |
| 81786 | TRIM7    | 15079462 |
| 3692  | EIF6     | 12654568 |
| 6118  | RPA2     | 12804446 |
| 55336 | FBXL8    | 15680141 |
| 10422 | UBAC1    | 13436367 |
| 3712  | IVD      | 16877963 |
| 51684 | SUFU     | 15342037 |
| 4688  | NCF2     | 12804408 |
| 26061 | HACL1    | 12804440 |
| 10769 | PLK2     | 15530206 |
| 55034 | MOCOS    | 15082341 |
| 2792  | GNGT1    | 20810426 |
| 11145 | HRASLS3  | 12655072 |
| 11031 | RAB31    | 12654622 |
| 27243 | CHMP2A   | 12803364 |
| 4729  | NDUFV2   | 12804450 |
| 873   | CBR1     | 12803380 |
| 57215 | THAP11   | 15082546 |
| 3420  | IDH3B    | 12805012 |
| 4782  | NFIC     | 15082409 |
| 56172 | ANKH     | 15778895 |
| 7364  | UGT2B7   | 21411301 |

|        |          |          |
|--------|----------|----------|
| 2719   | GPC3     | 23271173 |
| 6749   | SSRP1    | 13477284 |
| 51522  | TMEM14C  | 12803354 |
| 572    | BAD      | 12804898 |
| 196383 | MGC7036  | 15278388 |
| 51523  | CXXC5    | 12803342 |
| 8192   | CLPP     | 12804196 |
| 5631   | PRPS1    | 12804406 |
| 51400  | PPME1    | 12804370 |
| 10206  | TRIM13   | 13097764 |
| 64754  | SMYD3    | 21410973 |
| 3898   | LAD1     | 14602472 |
| 29959  | NRBP1    | 12654756 |
| 10664  | CTCF     | 15679929 |
| 83640  | FAM103A1 | 13177690 |
| 29100  | HSPC171  | 13111781 |
| 7078   | TIMP3    | 15679942 |
| 9143   | SYNGR3   | 15559439 |
| 246243 | RNASEH1  | 12804228 |
| 4070   | TACSTD2  | 14495610 |
| 6941   | TCF19    | 12803348 |
| 587    | BCAT2    | 12804896 |
| 23466  | CBX6     | 15082393 |
| 2313   | FLI1     | 12804518 |
| 27301  | APEX2    | 12804202 |
| 79414  | LRFN3    | 13097761 |
| 50     | ACO2     | 15559447 |
| 4799   | NFX1     | 15082472 |
| 6155   | RPL27    | 12804566 |
| 6747   | SSR3     | 16877966 |
| 11235  | PDCD10   | 12803370 |
| 23401  | FRAT2    | 18042885 |
| 977    | CD151    | 12655048 |
| 3430   | IFI35    | 12655016 |
| 10933  | MORF4L1  | 18605582 |
| 79080  | CCDC86   | 12655056 |
| 23237  | ARC      | 15147373 |
| 7013   | TERF1    | 20810195 |
| 2288   | FKBP4    | 12804710 |
| 90993  | CREB3L1  | 15559461 |
| 6584   | SLC22A5  | 15147377 |
| 2022   | ENG      | 15679935 |
| 9610   | RIN1     | 15680147 |
| 5256   | PHKA2    | 15559342 |
| 138065 | RNF183   | 15991881 |
| 924    | CD7      | 15342050 |
| 6835   | SURF2    | 15680136 |
| 788    | SLC25A20 | 12804552 |
| 54852  | PAQR5    | 24657740 |
| 3920   | LAMP2    | 12804214 |
| 4245   | MGAT1    | 13097752 |

|        |          |          |
|--------|----------|----------|
| 7067   | THRA     | 12653000 |
| 387032 | ZKSCAN4  | 15559335 |
| 9099   | USP2     | 12804194 |
| 4076   | CAPRIN1  | 12804616 |
| 9100   | USP10    | 12653004 |
| 5619   | PRM1     | 13277537 |
| 25873  | RPL36    | 12804380 |
| 3399   | ID3      | 13111878 |
| 51645  | PPIL1    | 12804374 |
| 7980   | TFPI2    | 13529109 |
| 114897 | C1QTNF1  | 18204860 |
| 4060   | LUM      | 13937864 |
| 50814  | NSDHL    | 12652968 |
| 28969  | BZW2     | 12804386 |
| 7280   | TUBB2A   | 12654708 |
| 2202   | EFEMP1   | 15680134 |
| 79058  | ASPSCR1  | 17511731 |
| 23062  | GGA2     | 12653040 |
| 50853  | VILL     | 12652964 |
| 53822  | FXVD7    | 17391356 |
| 2745   | GLRX     | 13529037 |
| 6288   | SAA1     | 13937838 |
| 4218   | RAB8A    | 12804236 |
| 2258   | FGF13    | 15706433 |
| 6696   | SPP1     | 13937828 |
| 723790 | HIST2H2A | 12804444 |
| 6164   | RPL34    | 12804692 |
| 3489   | IGFBP6   | 13097569 |
| 5603   | MAPK13   | 13325217 |
| 5008   | OSM      | 15079522 |
| 2252   | FGF7     | 15147344 |
| 4312   | MMP1     | 15530200 |
| 6623   | SNCG     | 15559464 |
| 8031   | NCOA4    | 16306752 |
| 226    | ALDOA    | 16877048 |
| 4102   | MAGEA3   | 16877053 |
| 1019   | CDK4     | 16936531 |
| 7163   | TPD52    | 17390256 |
| 3486   | IGFBP3   | 17511987 |
| 598    | BCL2L1   | 17939633 |
| 595    | CCND1    | 19264142 |
| 2237   | FEN1     | 19718776 |
| 8650   | NUMB     | 20070355 |
| 5468   | PPARG    | 20336230 |
| 5606   | MAP2K3   | 21618348 |
| 3600   | IL15     | 26787985 |
| 4105   | MAGEA6   | 27371333 |
| 8614   | STC2     | 33875707 |
| 8712   | PAGE1    | 33988857 |
| 6280   | S100A9   | 34783534 |
| 1903   | EDG3     | 38173856 |

|       |         |          |
|-------|---------|----------|
| 10983 | CCNI    | 38197480 |
| 5111  | PCNA    | 38383149 |
| 2113  | ETS1    | 29881    |
| 1326  | MAP3K8  | 31244    |
| 1440  | CSF3    | 31693    |
| 3479  | IGF1    | 32991    |
| 5329  | PLAUR   | 37604    |
| 596   | BCL2    | 179370   |
| 6275  | S100A4  | 179916   |
| 894   | CCND2   | 179999   |
| 960   | CD44    | 180129   |
| 1017  | CDK2    | 180177   |
| 4072  | TACSTD1 | 181132   |
| 3725  | JUN     | 186624   |
| 207   | AKT1    | 190827   |
| 5888  | RAD51   | 285976   |
| 1977  | EIF4E   | 306486   |
| 578   | BAK1    | 595923   |
| 3490  | IGFBP7  | 861520   |
| 1029  | CDKN2A  | 862412   |
| 8290  | HIST3H3 | 871259   |
| 638   | BIK     | 929654   |
| 573   | BAG1    | 1143475  |
| 11031 | RAB31   | 1388194  |
| 4070  | TACSTD2 | 1524102  |
| 11200 | CHEK2   | 3982839  |
| 4582  | MUC1    | 4204966  |
| 347   | APOD    | 4502162  |
| 8823  | FGF16   | 4503690  |
| 2574  | GAGE2   | 4503878  |
| 2576  | GAGE4   | 4503882  |
| 3606  | IL18    | 4504652  |
| 5155  | PDGFB   | 4505680  |
| 7031  | TFF1    | 4507450  |
| 2697  | GJA1    | 4755136  |
| 388   | RHOB    | 4757763  |
| 9077  | DIRAS3  | 4757771  |
| 2255  | FGF10   | 4758359  |
| 389   | RHOC    | 4885066  |
| 3265  | HRAS    | 4885424  |
| 3939  | LDHA    | 5031856  |
| 5915  | RARB    | 5616236  |
| 10000 | AKT3    | 5804885  |
| 813   | CALU    | 6005991  |
| 5245  | PHB     | 6031190  |
| 2353  | FOS     | 6552332  |
| 5947  | RBP1    | 8400726  |
| 1027  | CDKN1B  | 9652559  |
| 8519  | IFITM1  | 12654158 |
| 2810  | SFN     | 12803037 |
| 4700  | NDUFA6  | 12803858 |

8900 CCNA1  
891 CCNB1  
9133 CCNB2  
7157 TP53  
1026 CDKN1A  
595 CCND1  
5111 PCNA  
79444 BIRC7  
332 BIRC5  
4102 MAGEA3  
4105 MAGEA6  
25803 SPDEF  
4609 MYC  
3945 LDHB  
6278 S100A7  
2896 GRN



## Supplementary Table 2 List of genes printed in figure 3

| GeneID | Gene Sym | Reference | GI |
|--------|----------|-----------|----|
| 123887 | ZG16     | 20810120  |    |
| 6000   | RGS7     | 18314629  |    |
| 11284  | PNKP     | 21707154  |    |
| 5345   | SERPINF2 | 21594845  |    |
| 33     | ACADL    | 24660233  |    |
| 26330  | GAPDHS   | 22137783  |    |
| 169966 | FAM46D   | 23271016  |    |
| 901    | CCNG2    | 21619119  |    |
| 11069  | RAPGEF4  | 18645150  |    |
| 57409  | MIF4GD   | 21707111  |    |
| 169693 | C9orf71  | 20988238  |    |
| 8303   | SNN      | 22209020  |    |
| 3156   | HMGCR    | 21707181  |    |
| 84101  | USP44    | 21265142  |    |
| 2182   | ACSL4    | 23273826  |    |
| 881    | CCIN     | 17512603  |    |
| 55867  | SLC22A11 | 21706713  |    |
| 2676   | GFRA3    | 23274188  |    |
| 84572  | GNPTG    | 15779034  |    |
| 5128   | PCK2     | 21542570  |    |
| 84692  | CCDC54   | 21314970  |    |
| 27232  | GNMT     | 21619157  |    |
| 2123   | EVI2A    | 23272679  |    |
| 57092  | PCNP     | 18314419  |    |
| 4184   | SMCP     | 15779037  |    |
| 205564 | SENP5    | 21265144  |    |
| 84078  | KBTBD7   | 18314477  |    |
| 6583   | SLC22A4  | 20271468  |    |
| 1102   | RCBTB2   | 20810514  |    |
| 54474  | KRT20    | 21594988  |    |
| 9182   | PAMCI    | 21594848  |    |
| 9046   | DOK2     | 21618482  |    |
| 57863  | CADM3    | 21708057  |    |
| 10140  | TOB1     | 21618646  |    |
| 283238 | MGC34821 | 21706723  |    |
| 496    | ATP4B    | 20809654  |    |
| 132112 | RTP1     | 21961544  |    |
| 84708  | LNX1     | 21961542  |    |
| 627    | BDNF     | 20987591  |    |
| 6097   | RORC     | 21594879  |    |
| 11022  | TDRKH    | 21595811  |    |
| 8277   | TKTL1    | 19263484  |    |
| 51449  | PCYOX1   | 21708071  |    |
| 5624   | PROC     | 21707770  |    |
| 83659  | TEKT1    | 15779055  |    |
| 51704  | GPRC5B   | 21759766  |    |
| 29882  | ANAPC2   | 21595797  |    |
| 2669   | GEM      | 18314424  |    |

|        |          |          |
|--------|----------|----------|
| 56942  | C16orf61 | 21595752 |
| 7447   | VSNL1    | 18314426 |
| 54360  | CYTL1    | 21594982 |
| 7097   | TLR2     | 21708104 |
| 1048   | CEACAM5  | 21961633 |
| 3026   | HABP2    | 21618648 |
| 66002  | CYP4F12  | 23243429 |
| 168391 | GALNTL5  | 18314428 |
| 90459  | THEX1    | 23271400 |
| 9583   | ENTPD4   | 21759776 |
| 120400 | FAM55A   | 20809795 |
| 8477   | GPR65    | 23243459 |
| 10669  | CGREF1   | 21961321 |
| 378108 | TRIM74   | 21707221 |
| 349565 | NMNAT3   | 21706743 |
| 200185 | KRTCAP2  | 20987524 |
| 8100   | IFT88    | 21315054 |
| 5992   | RFX4     | 21040408 |
| 81616  | ACSBG2   | 18314433 |
| 28955  | DEXI     | 22902431 |
| 66036  | MTMR9    | 18314566 |
| 4675   | NAP1L3   | 23270931 |
| 11318  | ADMR     | 21961319 |
| 2209   | FCGR1A   | 21619685 |
| 2827   | GPR3     | 21618432 |
| 6834   | SURF1    | 20271429 |
| 6781   | STC1     | 20810067 |
| 25791  | NGEF     | 21595071 |
| 10512  | SEMA3C   | 21265134 |
| 221079 | ARL5B    | 18848192 |
| 7984   | ARHGEF5  | 15778952 |
| 10404  | PGCP     | 18088383 |
| 9039   | UBE1C    | 18605782 |
| 79412  | KREMEN2  | 13097629 |
| 771    | CA12     | 18645128 |
| 51534  | VTA1     | 13937779 |
| 2705   | GJB1     | 12803916 |
| 5013   | OTX1     | 14043259 |
| 397    | ARHGDIB  | 14327951 |
| 6522   | SLC4A2   | 14495651 |
| 5439   | POLR2J   | 18848195 |
| 57062  | DDX24    | 14250755 |
| 11132  | CAPN10   | 13279049 |
| 81533  | ITFG1    | 18848294 |
| 279    | AMY2A    | 13937900 |
| 54971  | BANP     | 14495633 |
| 2968   | GTF2H4   | 13436277 |
| 79102  | RNF26    | 14043098 |
| 654817 | NCF1C    | 12803938 |
| 64231  | MS4A6A   | 18605535 |
| 10195  | ALG3     | 12803980 |

|        |          |          |
|--------|----------|----------|
| 81285  | OR51E2   | 18088468 |
| 5997   | RGS2     | 13937881 |
| 6013   | RLN1     | 13543608 |
| 51506  | UFC1     | 13528770 |
| 2170   | FABP3    | 13937836 |
| 5336   | PLCG2    | 14043154 |
| 4605   | MYBL2    | 14043193 |
| 5105   | PCK1     | 18645160 |
| 28976  | ACAD9    | 14044101 |
| 3142   | HLX      | 13938328 |
| 2117   | ETV3     | 18605788 |
| 751867 | SNHG3-RC | 13938340 |
| 55968  | NSFL1C   | 12803908 |
| 8613   | PPAP2B   | 14327943 |
| 10481  | HOXB13   | 13937957 |
| 4801   | NFYB     | 13529070 |
| 79706  | PRKRIP1  | 15679979 |
| 1054   | CEBPG    | 14043188 |
| 7047   | TGM4     | 13937805 |
| 84962  | JUB      | 14043184 |
| 1327   | COX4I1   | 14250513 |
| 26986  | PABPC1   | 16358989 |
| 8659   | ALDH4A1  | 14043186 |
| 311    | ANXA11   | 14043152 |
| 6663   | SOX10    | 12803952 |
| 8463   | TEAD2    | 14043136 |
| 29763  | PACSIN3  | 14043957 |
| 84517  | ARPM1    | 13938318 |
| 64805  | P2RY12   | 17389766 |
| 57325  | CSRP2BP  | 14043102 |
| 389    | RHOC     | 13938242 |
| 931    | MS4A1    | 12803920 |
| 84725  | PLEKHA8  | 12803978 |
| 83540  | NUF2     | 14250143 |
| 5327   | PLAT     | 13938220 |
| 51132  | RNF12    | 15426503 |
| 4176   | MCM7     | 15426527 |
| 5441   | POLR2L   | 13543491 |
| 10273  | STUB1    | 14043118 |
| 81631  | MAP1LC3E | 17391392 |
| 10556  | RPP30    | 13937783 |
| 969    | CD69     | 13937862 |
| 7416   | VDAC1    | 14250131 |
| 51510  | CHMP5    | 13937758 |
| 1155   | TBCB     | 13543641 |
| 9502   | XAGE2    | 14328031 |
| 3043   | HBB      | 13937928 |
| 154791 | C7orf55  | 14250109 |
| 56949  | XAB2     | 13938178 |
| 55768  | NGLY1    | 13938210 |
| 84838  | ZNF496   | 13938273 |

|       |         |          |
|-------|---------|----------|
| 81607 | PVRL4   | 14714573 |
| 55929 | DMAP1   | 12804006 |
| 5553  | PRG2    | 13543541 |
| 5320  | PLA2G2A | 13543520 |
| 5052  | PRDX1   | 13937906 |
| 10136 | ELA3A   | 13937847 |
| 55    | ACPP    | 14250149 |
| 3624  | INHBA   | 14043814 |
| 5671  | PSG3    | 13543532 |
| 80218 | NAT13   | 15215283 |
| 5947  | RBP1    | 8400726  |
| 7163  | TPD52   | 17390256 |
| 5008  | OSM     | 15079522 |
| 3600  | IL15    | 26787985 |
| 6164  | RPL34   | 12804692 |
| 595   | CCND1   | 19264142 |
| 8712  | PAGE1   | 33988857 |
| 6280  | S100A9  | 34783534 |
| 8519  | IFITM1  | 12654158 |
| 2576  | GAGE4   | 4503882  |
| 2574  | GAGE2   | 4503878  |
| 1326  | MAP3K8  | 31244    |
| 2697  | GJA1    | 4755136  |
| 5245  | PHB     | 6031190  |
| 347   | APOD    | 4502162  |
| 8823  | FGF16   | 4503690  |
| 8290  | HIST3H3 | 871259   |
| 5603  | MAPK13  | 13325217 |
| 4102  | MAGEA3  | 16877053 |
| 10983 | CCNI    | 38197480 |
| 3939  | LDHA    | 5031856  |
| 2896  | GRN     |          |
| 2255  | FGF10   | 4758359  |
| 595   | CCND1   |          |
| 5111  | PCNA    | 38383149 |
| 1903  | EDG3    | 38173856 |
| 596   | BCL2    | 179370   |
| 6278  | S100A7  |          |
| 4609  | MYC     |          |
| 25803 | SPDEF   |          |
| 4105  | MAGEA6  |          |
| 4102  | MAGEA3  |          |
| 332   | BIRC5   |          |
| 3945  | LDHB    |          |
| 5111  | PCNA    |          |
| 4105  | MAGEA6  | 27371333 |
| 1026  | CDKN1A  |          |
| 7157  | TP53    |          |
|       | C-EBNA1 |          |
|       | N-EBNA1 |          |
| 9133  | CCNB2   |          |

|        |          |          |
|--------|----------|----------|
| 891    | CCNB1    |          |
| 8900   | CCNA1    |          |
| 2252   | FGF7     | 15147344 |
| 3606   | IL18     | 4504652  |
| 4700   | NDUFA6   | 12803858 |
| 79444  | BIRC7    |          |
| 573    | BAG1     | 1143475  |
| 2113   | ETS1     | 29881    |
| 2353   | FOS      | 6552332  |
| 2237   | FEN1     | 19718776 |
| 5888   | RAD51    | 285976   |
| 3725   | JUN      | 186624   |
| 4070   | TACSTD2  | 1524102  |
| 1019   | CDK4     | 16936531 |
| 1017   | CDK2     | 180177   |
| 3486   | IGFBP3   | 17511987 |
| 4312   | MMP1     | 15530200 |
| 3490   | IGFBP7   | 861520   |
| 1029   | CDKN2A   | 862412   |
| 598    | BCL2L1   | 17939633 |
| 1977   | EIF4E    | 306486   |
| 578    | BAK1     | 595923   |
| 1027   | CDKN1B   | 9652559  |
| 11031  | RAB31    | 1388194  |
| 3265   | HRAS     | 4885424  |
| 638    | BIK      | 929654   |
| 6623   | SNCG     | 15559464 |
| 4072   | TACSTD1  | 181132   |
| 5606   | MAP2K3   | 21618348 |
| 894    | CCND2    | 179999   |
| 723790 | HIST2H2A | 12804444 |
| 6275   | S100A4   | 179916   |
| 813    | CALU     | 6005991  |
| 3489   | IGFBP6   | 13097569 |
| 2810   | SFN      | 12803037 |
| 9077   | DIRAS3   | 4757771  |
| 5468   | PPARG    | 20336230 |
| 226    | ALDOA    | 16877048 |
| 8614   | STC2     | 33875707 |
| 388    | RHOB     | 4757763  |
| 11200  | CHEK2    | 3982839  |
| 389    | RHOC     | 4885066  |
| 4582   | MUC1     | 4204966  |
| 207    | AKT1     | 190827   |
| 1440   | CSF3     | 31693    |
| 5915   | RARB     | 5616236  |
| 8031   | NCOA4    | 16306752 |
| 960    | CD44     | 180129   |
| 5329   | PLAUR    | 37604    |
| 3479   | IGF1     | 32991    |
| 10000  | AKT3     | 5804885  |

|       |          |          |
|-------|----------|----------|
| 5155  | PDGFB    | 4505680  |
| 7031  | TFF1     | 4507450  |
| 8650  | NUMB     | 20070355 |
| 1021  | CDK6     | 4502740  |
| 354   | KLK3     | 4502172  |
| 3217  | HOXB7    | 15929846 |
| 1397  | CRIP2    | 4503048  |
| 7424  | VEGFC    | 4885652  |
| 3574  | IL7      | 4504676  |
| 9636  | ISG15    | 4826773  |
| 3552  | IL1A     | 13236493 |
| 1026  | CDKN1A   | 11386202 |
| 3565  | IL4      | 4504668  |
| 3578  | IL9      | 10834979 |
| 7472  | WNT2     | 4507926  |
| 5266  | PI3      | 4505786  |
| 3576  | IL8      | 10834977 |
| 1522  | CTSZ     | 22538441 |
| 1075  | CTSC     | 4503140  |
| 2796  | GNRH1    | 4504054  |
| 2689  | GH2      | 18088829 |
| 1396  | CRIP1    | 4503046  |
| 3589  | IL11     | 10834993 |
| 581   | BAX      | 4757837  |
| 231   | AKR1B1   | 4502048  |
| 2885  | GRB2     | 4504110  |
| 11163 | NUDT4    | 10800135 |
| 7163  | TPD52    | 17390256 |
| 9134  | CCNE2    |          |
| 595   | CCND1    |          |
| 1021  | CDK6     |          |
| 1019  | CDK4     |          |
| 1017  | CDK2     |          |
| 3880  | KRT19    | 14043270 |
| 6282  | S100A11  | 5032056  |
| 3429  | IFI27    | 5031780  |
| 5054  | SERPINE1 | 16162125 |
| 4599  | MX1      | 4505290  |
| 3484  | IGFBP1   | 4504614  |
| 3487  | IGFBP4   | 16359145 |
| 1511  | CTSG     | 4503148  |
| 10286 | BCAS2    | 5031652  |
| 54205 | CYCS     | 11128018 |
| 2335  | FN1      | 13543399 |
| 7251  | TSG101   | 12803336 |
| 7474  | WNT5A    | 4507928  |
| 8061  | FOSL1    | 4885242  |
| 1512  | CTSH     | 23110954 |
| 3488  | IGFBP5   | 10834981 |
| 5304  | PIP      | 4505820  |
| 9577  | BRE      | 4757871  |

|       |         |          |
|-------|---------|----------|
| 2852  | GPER    | 4504090  |
| 9975  | NR1D2   | 2116671  |
| 1020  | CDK5    | 4826674  |
| 5599  | MAPK8   | 4506094  |
| 7101  | NR2E1   | 4507536  |
| 6822  | SULT2A1 | 4507306  |
| 1030  | CDKN2B  | 17981693 |
| 5578  | PRKCA   | 4506066  |
| 1514  | CTSL1   | 4503154  |
| 7124  | TNF     | 10835154 |
| 10062 | NR1H3   | 5031892  |
| 2258  | FGF13   | 4758365  |
| 8607  | RUVBL1  | 4506752  |
| 6750  | SST     | 4507242  |
| 3586  | IL10    | 10835140 |
| 3553  | IL1B    | 10835144 |
| 2288  | FKBP4   | 4503728  |
| 57126 | CD177   | 9966888  |
| 10022 | INSL5   | 5729885  |
| 2625  | GATA3   | 13905019 |
| 10850 | CCL27   | 5730034  |
| 7483  | WNT9A   | 15082260 |
| 11171 | STRAP   | 6005931  |
| 7298  | TYMS    | 4507750  |
| 3596  | IL13    | 4504644  |
| 2289  | FKBP5   | 4758383  |
| 1999  | ELF3    | 13097734 |
| 5617  | PRL     | 4506104  |
| 1435  | CSF1    | 18088910 |
| 983   | CDC2    | 4502708  |
| 5602  | MAPK10  | 4506080  |
| 3856  | KRT8    | 4504918  |
| 6678  | SPARC   | 4507170  |
| 486   | FXD2    | 15342033 |
| 8668  | EIF3I   | 4503512  |
| 3688  | ITGB1   | 14495714 |
| 3866  | KRT15   | 33876966 |
| 11162 | NUDT6   | 11095442 |
| 5728  | PTEN    | 4506248  |
| 8721  | EDF1    | 24497592 |
| 3163  | HMOX2   | 33876654 |
| 6251  | RSU1    | 14250498 |
| 9992  | KCNE2   | 27436977 |
| 4155  | MBP     | 187400   |
| 570   | BAAT    | 4502350  |
| 25828 | TXN2    | 29791725 |
|       |         | 38196940 |
| 11258 | DCTN3   | 22165423 |
| 3043  | HBB     | 28302128 |
| 11126 | CD160   | 15680224 |
| 2069  | EREG    | 4557566  |

|       |         |          |
|-------|---------|----------|
| 4197  | MDS1    | 4826827  |
| 7134  | TNNC1   | 20987724 |
| 3046  | HBE1    | 34190424 |
| 5162  | PDHB    | 38197474 |
| 11061 | LECT1   | 5901931  |
| 7125  | TNNC2   | 40807466 |
| 443   | ASPA    | 20810517 |
| 312   | ANXA13  | 4757753  |
| 2668  | GDNF    | 4503974  |
| 638   | BIK     | 7262371  |
| 5443  | POMC    | 4505948  |
| 3440  | IFNA2   | 11067750 |
| 835   | CASP2   | 537293   |
| 7532  | YWHAG   | 34193665 |
| 951   | CD37    | 4502662  |
| 4817  | NIT1    | 5031946  |
| 1266  | CNN3    | 4502922  |
| 9402  | GRAP2   | 19344011 |
| 8544  | PIR     | 33876802 |
| 9939  | RBM8A   | 15812217 |
| 6770  | STAR    | 14714802 |
| 22924 | MAPRE3  | 15079433 |
| 8624  | DSCR2   | 4505022  |
| 1353  | COX11   | 4758033  |
| 7008  | TEF     | 34486096 |
| 5443  | POMC    | 4505948  |
| 5179  | PENK    | 21619111 |
| 29079 | MED4    | 40254874 |
| 2730  | GCLM    | 27469698 |
| 1265  | CNN2    | 4758017  |
| 3112  | HLA-DOB | 13543903 |
| 2730  | GCLM    | 27469698 |
| 3384  | ICAM2   | 13111858 |
| 7177  | TPSAB1  | 13775594 |
| 6447  | SCG5    | 4506916  |
| 332   | BIRC5   | 21707886 |
| 3381  | IBSP    | 338083   |
| 7507  | XPA     | 286028   |
| 4084  | MXD1    | 187288   |
| 11021 | RAB35   | 763121   |
| 9367  | RAB9A   | 1174146  |
| 3934  | LCN2    | 5031852  |
| 7001  | PRDX2   | 440307   |
| 2012  | EMP1    | 1542882  |
| 7975  | MAFK    | 3068760  |
| 2152  | F3      | 10518499 |
| 1474  | CST6    | 1488690  |
| 595   | CCND1   | 35631    |
| 1603  | DAD1    | 493244   |
| 2920  | CXCL2   | 183628   |
| 2313  | FLI1    | 7025922  |



|       |         |          |
|-------|---------|----------|
| 5770  | PTPN1   | 190741   |
| 2002  | ELK1    | 11496880 |
| 1454  | CSNK1E  | 852056   |
| 1161  | ERCC8   | 975301   |
| 22808 | MRAS    | 4105177  |
| 10465 | PPIH    | 5454153  |
| 7320  | UBE2B   | 184045   |
| 1915  | EEF1A1  | 31097    |
| 760   | CA2     | 179794   |
| 10581 | IFITM2  | 16307214 |
| 10228 | STX6    | 2695736  |
| 4803  | NGFB    | 5917654  |
| 391   | RHOG    | 4502218  |
| 998   | CDC42   | 4757951  |
| 3398  | ID2     | 4504570  |
| 4282  | MIF     | 4505184  |
| 4149  | MAX     | 4505114  |
| 356   | FASLG   | 601892   |
| 7356  | SCGB1A1 | 21359852 |
| 1633  | DCK     | 4503268  |
| 5019  | OXCT1   | 1519051  |
| 3055  | HCK     | 183911   |
| 5325  | PLAGL1  | 27894292 |
| 3646  | EIF3E   | 2114362  |
| 5887  | RAD23B  | 498147   |
| 5984  | RFC4    | 1498255  |
| 5890  | RAD51L1 | 2262208  |
| 301   | ANXA1   | 34387    |
| 4072  | TACSTD1 | 15928631 |
| 2067  | ERCC1   | 567007   |
| 3479  | IGF1    | 184833   |
| 5375  | PMP2    | 23271223 |
| 4507  | MTAP    | 6006025  |
| 5872  | RAB13   | 4506362  |
| 5721  | PSME2   | 4506236  |
| 24150 | TP53TG3 | 7662674  |
| 2828  | GPR4    | 4885334  |
| 8190  | MIA     | 5729924  |
| 8514  | KCNAB2  | 27436968 |
| 9522  | SCAMP1  | 15929235 |
| 9522  | SCAMP1  | 21706508 |
| 23463 | ICMT    | 20380416 |
| 6288  | SAA1    | 40316911 |
| 4084  | MXD1    | 4505068  |
| 3265  | HRAS    | 4885424  |
| 9230  | RAB11B  | 20379069 |
| 873   | CBR1    | 33991545 |
| 873   | CBR1    | 33991545 |
| 5869  | RAB5B   | 4506370  |
| 10549 | PRDX4   | 16876996 |
| 128   | ADH5    | 15779215 |

|       |          |          |
|-------|----------|----------|
| 6752  | SSTR2    | 18043108 |
| 1511  | CTSG     | 4503148  |
| 10140 | TOB1     | 21618646 |
| 5873  | RAB27A   | 34485705 |
| 6165  | RPL35A   | 38541168 |
| 54741 | LEPROT   | 33990029 |
| 308   | ANXA5    | 33876205 |
| 10282 | BET1     | 41349434 |
| 11337 | GABARAP  | 4894375  |
| 5266  | PI3      | 4505786  |
| 6843  | VAMP1    | 40549443 |
| 6231  | RPS26    | 12803548 |
| 6181  | RPLP2    | 38383132 |
| 6181  | RPLP2    | 38383132 |
| 5720  | PSME1    | 33988241 |
| 8428  | STK24    | 23274190 |
| 5696  | PSMB8    | 4758969  |
| 8818  | DPM2     | 24497593 |
| 5500  | PPP1CB   | 33877033 |
| 6449  | SGTA     | 12804260 |
| 9255  | SCYE1    | 33878437 |
| 10667 | FARS2    | 5729819  |
| 8061  | FOSL1    | 16741703 |
| 3202  | HOXA5    | 9506790  |
| 4049  | LTA      | 21961576 |
| 388   | RHOB     | 4757763  |
| 26071 | FAM127B  | 7661599  |
| 11072 | DUSP14   | 13325259 |
| 10314 | LANCL1   | 34192063 |
| 23484 | LEPROTL1 | 33990744 |
| 1490  | CTGF     | 37622417 |
| 6291  | SAA4     | 10835094 |
| 10067 | SCAMP3   | 33990706 |
| 3753  | KCNE1    | 4557686  |
| 1329  | COX5B    | 38197026 |
| 175   | AGA      | 15214538 |
| 5423  | POLB     | 4505930  |
| 10005 | ACOT8    | 34577074 |
| 11072 | DUSP14   | 13325259 |
| 966   | CD59     | 37589019 |
| 58    | ACTA1    | 15214922 |
| 72    | ACTG2    | 15214974 |
| 2152  | F3       | 15029642 |
| 7001  | PRDX2    | 24659878 |
| 6623  | SNCG     | 15559464 |
| 8740  | TNFSF14  | 37182741 |
| 8079  | MLF2     | 33876576 |
| 6181  | RPLP2    | 38383132 |
| 3280  | HES1     | 8400709  |
| 8334  | HIST1H2A | 21396481 |
| 57016 | AKR1B10  | 33991228 |

|        |          |          |
|--------|----------|----------|
| 11021  | RAB35    | 5803134  |
| 5872   | RAB13    | 4506362  |
| 9232   | PTTG1    | 11038651 |
| 10766  | TOB2     | 24659239 |
| 4357   | MPST     | 16876912 |
| 1460   | CSNK2B   | 21428316 |
| 10959  | TMED2    | 19683998 |
| 10987  | COPS5    | 33876500 |
| 3337   | DNAJB1   | 38197192 |
| 11158  | RABL2B   | 18999458 |
| 11158  | RABL2B   | 18999458 |
| 9021   | SOCS3    | 38173839 |
| 5873   | RAB27A   | 34485705 |
| 1854   | DUT      | 21708113 |
| 4115   | MAGEB4   | 29171715 |
| 9290   | GPR55    | 21595841 |
| 7356   | SCGB1A1  | 38197261 |
| 694    | BTG1     | 33869459 |
| 2319   | FLOT2    | 16878172 |
| 2353   | FOS      | 33872858 |
| 1901   | EDG1     | 17391431 |
| 5549   | PRELP    | 21618472 |
| 2865   | FFAR3    | 23272748 |
| 10654  | PMVK     | 13543886 |
| 723790 | HIST2H2A | 12804444 |
| 3577   | IL8RA    | 4504680  |
| 359    | AQP2     | 27769001 |
| 3586   | IL10     | 10835140 |
| 366    | AQP9     | 11038652 |
| 7123   | CLEC3B   | 4507556  |
| 7135   | TNNI1    | 339964   |
| 5919   | RARRES2  | 8051632  |
| 360    | AQP3     | 9257193  |
| 362    | AQP5     | 21432082 |
| 805    | CALM2    | 17391485 |
| 2348   | FOLR1    | 33877393 |
| 8934   | RAB7L1   | 33876898 |
| 3906   | LALBA    | 4504946  |
| 10423  | CDIPT    | 33876229 |
| 1841   | DTYMK    | 38114725 |
| 7137   | TNNI3    | 339966   |
| 10652  | YKT6     | 2529436  |
| 6376   | CX3CL1   | 4506856  |
| 3957   | LGALS2   | 37590555 |
| 1471   | CST3     | 15341821 |
| 7507   | XPA      | 4507936  |
| 8799   | PEX11B   | 4505718  |
| 2987   | GUK1     | 1513314  |
| 2922   | GRP      | 4504158  |
| 11164  | NUDT5    | 7657402  |
| 7132   | TNFRSF1A | 4507574  |

|       |         |          |
|-------|---------|----------|
| 10957 | PNRC1   | 5802981  |
| 2706  | GJB2    | 6980947  |
| 27250 | PDCD4   | 7657448  |
| 10422 | UBAC1   | 7705380  |
| 4602  | MYB     | 4885496  |
| 5884  | RAD17   | 4506382  |
| 7048  | TGFBR2  | 4507468  |
| 9973  | CCS     | 4826664  |
| 2114  | ETS2    | 4885220  |
| 3570  | IL6R    | 4504672  |
| 3397  | ID1     | 4504568  |
| 4151  | MB      | 15778932 |
| 6441  | SFTPD   | 34766    |
| 186   | AGTR2   | 6715584  |
| 3162  | HMOX1   | 4504436  |
| 597   | BCL2A1  | 16740835 |
| 4633  | MYL2    | 21411328 |
| 11034 | DSTN    | 33874740 |
| 4792  | NFKBIA  | 10092618 |
| 6760  | SS18    | 5032124  |
| 3958  | LGALS3  | 1196441  |
| 967   | CD63    | 33876593 |
| 10567 | RABAC1  | 38114825 |
| 9535  | GMFG    | 4758439  |
| 2764  | GMFB    | 31795542 |
| 967   | CD63    | 33876593 |
| 10490 | VTI1B   | 5454165  |
| 10682 | EBP     | 16306767 |
| 3934  | LCN2    | 5031852  |
| 27306 | PGDS    | 7657456  |
| 2168  | FABP1   | 21618453 |
| 6456  | SH3GL2  | 4506930  |
| 2354  | FOSB    | 5803016  |
| 2029  | ENSA    | 13325294 |
| 6846  | XCL2    | 38569448 |
| 6632  | SNRPD1  | 12804598 |
| 10289 | EIF1B   | 5031710  |
| 6633  | SNRPD2  | 38197590 |
| 6917  | TCEA1   | 5803190  |
| 203   | AK1     | 4502010  |
| 6134  | RPL10   | 20070800 |
| 3174  | HNF4G   | 33096751 |
| 5341  | PLEK    | 17391305 |
| 4879  | NPPB    | 19343959 |
| 8504  | PEX3    | 15930133 |
| 11261 | CHP     | 30353983 |
| 977   | CD151   | 33870216 |
| 4987  | OPRL1   | 23468340 |
| 4733  | DRG1    | 4758795  |
| 7389  | UROD    | 12804698 |
| 8741  | TNFSF13 | 4507598  |

|       |          |          |
|-------|----------|----------|
| 5264  | PHYH     | 20809598 |
| 5621  | PRNP     | 34335269 |
| 1192  | CLIC1    | 14251208 |
| 10267 | RAMP1    | 37588975 |
| 2040  | STOM     | 38016910 |
| 874   | CBR3     | 33990900 |
| 1497  | CTNS     | 4826681  |
| 432   | ASGR1    | 33879712 |
| 23484 | LEPROTL1 | 33990744 |
| 4068  | SH2D1A   | 18088433 |
| 10263 | CDK2AP2  | 38114811 |
| 8800  | PEX11A   | 16307216 |
| 6882  | TAF11    | 5032150  |
| 6418  | SET      | 4506890  |
| 3903  | LAIR1    | 20379722 |
| 387   | RHOA     | 10835048 |
| 5276  | SERPINI2 | 10947029 |
| 8682  | PEA15    | 7019424  |
| 9141  | PDCD5    | 4759223  |
| 26292 | MYCBP    | 8850230  |
| 10016 | PDCD6    | 7019484  |
| 9607  | CARTPT   | 4757909  |
| 6372  | CXCL6    | 4506850  |
| 1396  | CRIP1    | 4503046  |
| 5756  | TWF1     | 4506274  |
| 9592  | IER2     | 4758313  |
| 3159  | HMGA1    | 4504432  |
| 11165 | NUDT3    | 5729803  |
| 5216  | PFN1     | 4826897  |
| 2919  | CXCL1    | 4504152  |
| 3452  | IFNA21   | 4504594  |
| 3451  | IFNA17   | 10880984 |
| 2023  | ENO1     | 4503570  |
| 8915  | BCL10    | 4502378  |
| 3489  | IGFBP6   | 11321592 |
| 5983  | RFC3     | 4506488  |
| 6282  | S100A11  | 5032056  |
| 1337  | COX6A1   | 10047079 |
| 7356  | SCGB1A1  | 4507808  |
| 7320  | UBE2B    | 4507770  |
| 6376  | CX3CL1   | 4506856  |
| 1454  | CSNK1E   | 4503092  |
| 5763  | PTMS     | 4506278  |
| 51741 | WVOX     | 7706522  |
| 1019  | CDK4     | 4502734  |
| 4700  | NDUFA6   | 4505358  |
| 7423  | VEGFB    | 4507886  |
| 6817  | SULT1A1  | 4507300  |
| 369   | ARAF     | 4502192  |
| 3430  | IFI35    | 12655016 |
| 4521  | NUDT1    | 4505274  |

|       |         |          |
|-------|---------|----------|
| 4071  | TM4SF1  | 14250074 |
| 27302 | BMP10   | 7656927  |
| 4681  | NBL1    | 4885508  |
| 3604  | TNFRSF9 | 5730094  |
| 5610  | EIF2AK2 | 4506102  |
| 902   | CCNH    | 4502622  |
| 1337  | COX6A1  | 10047079 |
| 2059  | EPS8    | 4758295  |
| 8667  | EIF3H   | 4503514  |
| 7481  | WNT11   | 4759319  |
| 8682  | PEA15   | 4505704  |
| 318   | NUDT2   | 4502124  |
| 6446  | SGK     | 5032090  |
| 1111  | CHEK1   | 4502802  |
| 6164  | RPL34   | 4506636  |
| 53822 | FXVD7   | 11612658 |
| 2752  | GLUL    | 4504026  |
| 10538 | BATF    | 5453562  |
| 653   | BMP5    | 10835090 |
| 1207  | CLNS1A  | 4502890  |
| 27243 | CHMP2A  | 7656921  |
| 7266  | DNAJC7  | 4507712  |
| 6660  | SOX5    | 5902113  |
| 1339  | COX6A2  | 4885148  |
